# Supplementary material for: Unlocking the Hidden Genetic Diversity of Varicosaviruses, the Neglected Plant Rhabdoviruses
Source: MDPI journal article supplement (doi:10.3390/pathogens11101127), 2022-09-29

**Supplementary Figure S1.** Stacked bar chart showing the number of previously reported varicosaviruses and in this study.

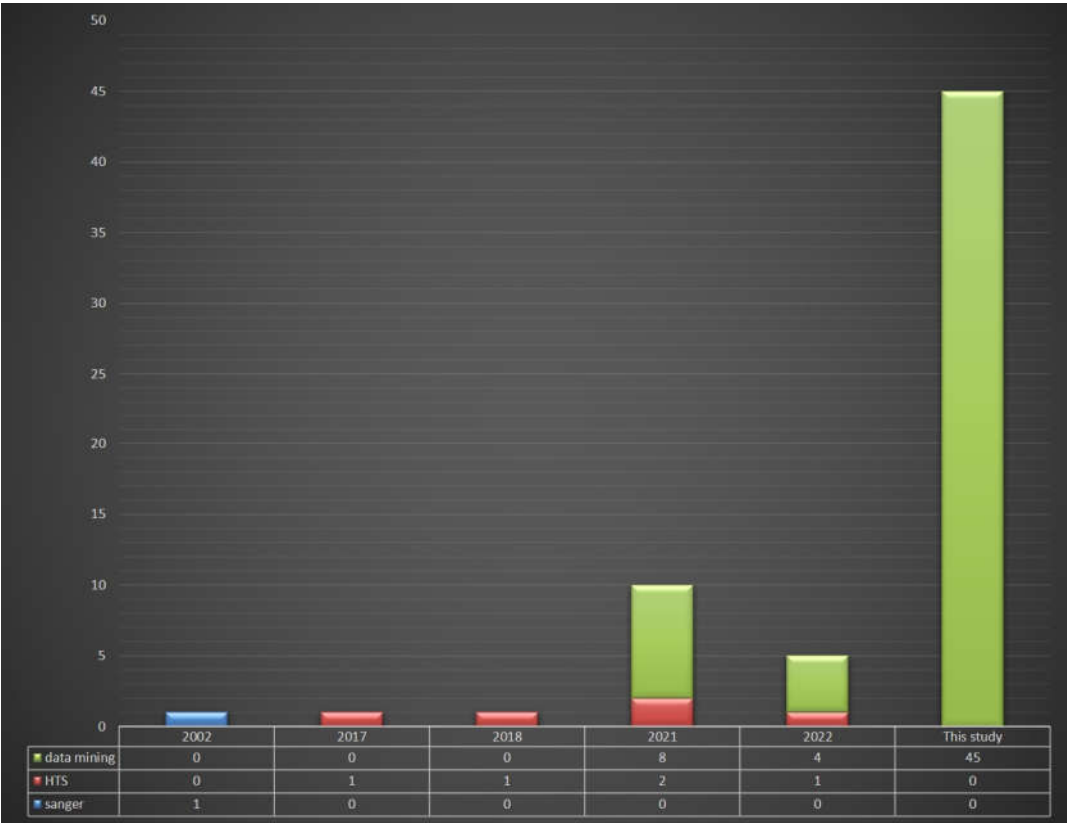

Supplement: s1 [file s1]
