# Supplementary material for: Unlocking the Hidden Genetic Diversity of Varicosaviruses, the Neglected Plant Rhabdoviruses
Source: MDPI journal article supplement (doi:10.3390/pathogens11101127), 2022-09-29
Supplement: s1 [file s1]

Supplementary Table S1. Virus names, abbreviations and NCBI accession numbers of varicosavirus sequences used in this study.

| <b>Virus name</b>                      | <b>Abbreviation</b> | <b>Accession number</b> |
|----------------------------------------|---------------------|-------------------------|
| Allium angulosum virus 1               | AAAnV1              | BK059208; BK059209      |
| Alopecurus myosuroides varicosavirus 1 | AMVV1               | LN713933; LN713934      |
| Brassica virus 1                       | BrV1                | BK014310; BK014311      |
| lettuce big-vein associated virus      | LBVaV               | AB075039; AB114138      |
| Lolium virus 1                         | LoV1                | BK014312; BK014313      |
| Melampyrum roseum virus 1              | MelRoV1             | BK014314; BK014315      |
| morning glory varicosavirus            | MGVV                | MW922438; MW922439      |
| Monoclea gottschei varicosavirus       | MgVV                | OW528612; OW527630      |
| Pinus flexilis virus 1                 | PiFleV1             | BK014316                |
| red clover-associated varicosavirus    | RCaVV               | MF918568; MF918569      |
| Spinach virus 1                        | SpV1                | BK061809; BK061810      |
| Tree fern varicosavirus                | TfVV                | OW528630; OW528632      |
| vitis varicosavirus                    | VVV                 | LC604719; LC604720      |
| Xinjiang varicosavirus                 | XVV                 | MW897032; MW897033      |
| Zostera-associated varicosavirus 1     | ZaVV1               | BK014484; BK014485      |
