# Supplementary material for: Unlocking the Hidden Genetic Diversity of Varicosaviruses, the Neglected Plant Rhabdoviruses
Source: Pathogens. 2022 Sep 29;11(10):1127. doi: 10.3390/pathogens11101127 (PMC9608074; doi:10.3390/pathogens11101127)
Supplement: Supplementary file 1 [file pathogens-11-01127-s001.zip › Supplementary Table S2.xlsx]

## Sheet: Hoja2
Supplementary Table S2. Amino acid sequence identity of the complete L gene ORF
Columna1	Column2	Column3
First Sequence	Second Sequence	Identity Score
Torreya_virus_1	Brassica_virus_1_Nap	33.64
Torreya_virus_1	Brassica_virus_1_Rap	33.14
Torreya_virus_1	Raphanus_virus_1	33.17
Torreya_virus_1	Erysimum_virus_1	33.47
Torreya_virus_1	Spinach_virus_1_Tur	32.66
Torreya_virus_1	Spinach_virus_1_Ole	33.12
Torreya_virus_1	Silene_virus_1	34.19
Torreya_virus_1	Triticum_virus_1	34.24
Torreya_virus_1	red_cloverassociated_Varicosavirus	33.57
Torreya_virus_1	Mellilotus_virus_1_Alb	31.87
Torreya_virus_1	Mellilotus_virus_1_Off	32.70
Torreya_virus_1	Centaurea_virus_1	32.42
Torreya_virus_1	Aponogeton_virus_1	33.05
Torreya_virus_1	Tanacetum_virus_1	33.12
Torreya_virus_1	Leucanthemum_virus_1	33.85
Torreya_virus_1	Artemisia_virus_1	34.34
Torreya_virus_1	Caladenia_virus_1	32.43
Torreya_virus_1	Ribes_virus_1	34.81
Torreya_virus_1	Arceuthobium_virus_8	34.96
Torreya_virus_1	Ranunculus_virus_1	33.35
Torreya_virus_1	Vincetoxicum_virus_1	34.38
Torreya_virus_1	Aconitum_virus_1	33.64
Torreya_virus_1	Zostera_associated_varicosavirus_1	35.53
Torreya_virus_1	Vitis_varicosavirus	33.86
Torreya_virus_1	Lupinus_virus_1	33.10
Torreya_virus_1	Apera_virus_1	33.48
Torreya_virus_1	Guizotia_virus_1	33.93
Torreya_virus_1	Melampyrum_roseum_virus_1	34.35
Torreya_virus_1	morning_glory_varicosavirus	34.71
Torreya_virus_1	Allium_angulosum_virus_1	34.42
Torreya_virus_1	Lolium_virus_1_Aru	35.07
Torreya_virus_1	Lolium_virus_1_Per	34.39
Torreya_virus_1	Alopecurus_myosuroides_varicosavirus_1	33.88
Torreya_virus_1	Holcus_virus_1	33.96
Torreya_virus_1	Pennisetum_virus_1	32.81
Torreya_virus_1	Zea_virus_1	33.86
Torreya_virus_1	Luffa_virus_1	34.05
Torreya_virus_1	Cucumis_virus_1	33.06
Torreya_virus_1	Streptoglossa_virus_1	37.59
Torreya_virus_1	Frullania_virus_1	37.56
Torreya_virus_1	Monoclea_gottschei_varicosalike_virus	36.20
Torreya_virus_1	Didymochlaena_virus_1	35.45
Torreya_virus_1	tree_fern_varicosalike_virus	36.21
Torreya_virus_1	Treubia_virus_1	35.51
Torreya_virus_1	Xinjiang_varicosavirus	34.89
Torreya_virus_1	lettuce_bigvein_associated_virus	34.72
Torreya_virus_1	Brassica_virus_2_Inc	36.21
Torreya_virus_1	Brassica_virus_2_Ole	36.32
Torreya_virus_1	Brassica_virus_2_Jun	36.06
Torreya_virus_1	Primula_virus_1	36.12
Torreya_virus_1	Asclepias_syriaca_virus_3	36.40
Torreya_virus_1	Picea_virus_1	32.06
Torreya_virus_1	Pinus_yunnanensis_virus_1	31.76
Torreya_virus_1	Pinus_flexilis_virus_1	31.89
Torreya_virus_1	Pinus_banksiana_virus_1	32.54
Torreya_virus_1	Abies_virus_1	30.53
Torreya_virus_1	Cupressus_virus_1	33.16
Torreya_virus_1	Sciadopitys_virus_1_Chi	33.17
Torreya_virus_1	Sciadopitys_virus_1_Can	33.43
Torreya_virus_1	Taxus_virus_1	31.03
Torreya_virus_1	Amentotaxus_virus_1	32.67
Brassica_virus_1_Nap	Brassica_virus_1_Rap	89.94
Brassica_virus_1_Nap	Raphanus_virus_1	68.70
Brassica_virus_1_Nap	Erysimum_virus_1	62.22
Brassica_virus_1_Nap	Spinach_virus_1_Tur	52.24
Brassica_virus_1_Nap	Spinach_virus_1_Ole	51.69
Brassica_virus_1_Nap	Silene_virus_1	51.02
Brassica_virus_1_Nap	Triticum_virus_1	50.92
Brassica_virus_1_Nap	red_cloverassociated_Varicosavirus	51.29
Brassica_virus_1_Nap	Mellilotus_virus_1_Alb	51.09
Brassica_virus_1_Nap	Mellilotus_virus_1_Off	51.54
Brassica_virus_1_Nap	Centaurea_virus_1	50.54
Brassica_virus_1_Nap	Aponogeton_virus_1	51.29
Brassica_virus_1_Nap	Tanacetum_virus_1	49.47
Brassica_virus_1_Nap	Leucanthemum_virus_1	49.30
Brassica_virus_1_Nap	Artemisia_virus_1	49.82
Brassica_virus_1_Nap	Caladenia_virus_1	50.97
Brassica_virus_1_Nap	Ribes_virus_1	48.06
Brassica_virus_1_Nap	Arceuthobium_virus_8	44.98
Brassica_virus_1_Nap	Ranunculus_virus_1	43.69
Brassica_virus_1_Nap	Vincetoxicum_virus_1	43.11
Brassica_virus_1_Nap	Aconitum_virus_1	42.71
Brassica_virus_1_Nap	Zostera_associated_varicosavirus_1	43.03
Brassica_virus_1_Nap	Vitis_varicosavirus	43.82
Brassica_virus_1_Nap	Lupinus_virus_1	42.12
Brassica_virus_1_Nap	Apera_virus_1	44.30
Brassica_virus_1_Nap	Guizotia_virus_1	42.58
Brassica_virus_1_Nap	Melampyrum_roseum_virus_1	43.05
Brassica_virus_1_Nap	morning_glory_varicosavirus	42.15
Brassica_virus_1_Nap	Allium_angulosum_virus_1	42.80
Brassica_virus_1_Nap	Lolium_virus_1_Aru	39.35
Brassica_virus_1_Nap	Lolium_virus_1_Per	39.51
Brassica_virus_1_Nap	Alopecurus_myosuroides_varicosavirus_1	38.74
Brassica_virus_1_Nap	Holcus_virus_1	39.43
Brassica_virus_1_Nap	Pennisetum_virus_1	37.69
Brassica_virus_1_Nap	Zea_virus_1	39.74
Brassica_virus_1_Nap	Luffa_virus_1	40.65
Brassica_virus_1_Nap	Cucumis_virus_1	40.14
Brassica_virus_1_Nap	Streptoglossa_virus_1	41.06
Brassica_virus_1_Nap	Frullania_virus_1	40.53
Brassica_virus_1_Nap	Monoclea_gottschei_varicosalike_virus	40.48
Brassica_virus_1_Nap	Didymochlaena_virus_1	41.79
Brassica_virus_1_Nap	tree_fern_varicosalike_virus	41.38
Brassica_virus_1_Nap	Treubia_virus_1	39.81
Brassica_virus_1_Nap	Xinjiang_varicosavirus	39.56
Brassica_virus_1_Nap	lettuce_bigvein_associated_virus	39.92
Brassica_virus_1_Nap	Brassica_virus_2_Inc	39.05
Brassica_virus_1_Nap	Brassica_virus_2_Ole	39.05
Brassica_virus_1_Nap	Brassica_virus_2_Jun	38.81
Brassica_virus_1_Nap	Primula_virus_1	39.87
Brassica_virus_1_Nap	Asclepias_syriaca_virus_3	39.36
Brassica_virus_1_Nap	Picea_virus_1	33.74
Brassica_virus_1_Nap	Pinus_yunnanensis_virus_1	35.01
Brassica_virus_1_Nap	Pinus_flexilis_virus_1	34.58
Brassica_virus_1_Nap	Pinus_banksiana_virus_1	35.24
Brassica_virus_1_Nap	Abies_virus_1	34.61
Brassica_virus_1_Nap	Cupressus_virus_1	34.48
Brassica_virus_1_Nap	Sciadopitys_virus_1_Chi	33.31
Brassica_virus_1_Nap	Sciadopitys_virus_1_Can	33.38
Brassica_virus_1_Nap	Taxus_virus_1	35.24
Brassica_virus_1_Nap	Amentotaxus_virus_1	34.34
Brassica_virus_1_Rap	Raphanus_virus_1	68.37
Brassica_virus_1_Rap	Erysimum_virus_1	62.19
Brassica_virus_1_Rap	Spinach_virus_1_Tur	52.04
Brassica_virus_1_Rap	Spinach_virus_1_Ole	51.49
Brassica_virus_1_Rap	Silene_virus_1	50.99
Brassica_virus_1_Rap	Triticum_virus_1	50.59
Brassica_virus_1_Rap	red_cloverassociated_Varicosavirus	51.22
Brassica_virus_1_Rap	Mellilotus_virus_1_Alb	50.89
Brassica_virus_1_Rap	Mellilotus_virus_1_Off	52.19
Brassica_virus_1_Rap	Centaurea_virus_1	50.77
Brassica_virus_1_Rap	Aponogeton_virus_1	52.50
Brassica_virus_1_Rap	Tanacetum_virus_1	49.72
Brassica_virus_1_Rap	Leucanthemum_virus_1	49.65
Brassica_virus_1_Rap	Artemisia_virus_1	49.65
Brassica_virus_1_Rap	Caladenia_virus_1	50.77
Brassica_virus_1_Rap	Ribes_virus_1	47.44
Brassica_virus_1_Rap	Arceuthobium_virus_8	45.44
Brassica_virus_1_Rap	Ranunculus_virus_1	43.72
Brassica_virus_1_Rap	Vincetoxicum_virus_1	43.50
Brassica_virus_1_Rap	Aconitum_virus_1	42.85
Brassica_virus_1_Rap	Zostera_associated_varicosavirus_1	43.38
Brassica_virus_1_Rap	Vitis_varicosavirus	43.74
Brassica_virus_1_Rap	Lupinus_virus_1	42.98
Brassica_virus_1_Rap	Apera_virus_1	45.30
Brassica_virus_1_Rap	Guizotia_virus_1	43.11
Brassica_virus_1_Rap	Melampyrum_roseum_virus_1	43.94
Brassica_virus_1_Rap	morning_glory_varicosavirus	42.66
Brassica_virus_1_Rap	Allium_angulosum_virus_1	43.15
Brassica_virus_1_Rap	Lolium_virus_1_Aru	38.47
Brassica_virus_1_Rap	Lolium_virus_1_Per	38.75
Brassica_virus_1_Rap	Alopecurus_myosuroides_varicosavirus_1	38.55
Brassica_virus_1_Rap	Holcus_virus_1	38.91
Brassica_virus_1_Rap	Pennisetum_virus_1	37.77
Brassica_virus_1_Rap	Zea_virus_1	39.63
Brassica_virus_1_Rap	Luffa_virus_1	39.83
Brassica_virus_1_Rap	Cucumis_virus_1	40.52
Brassica_virus_1_Rap	Streptoglossa_virus_1	40.25
Brassica_virus_1_Rap	Frullania_virus_1	40.79
Brassica_virus_1_Rap	Monoclea_gottschei_varicosalike_virus	39.67
Brassica_virus_1_Rap	Didymochlaena_virus_1	41.82
Brassica_virus_1_Rap	tree_fern_varicosalike_virus	41.80
Brassica_virus_1_Rap	Treubia_virus_1	40.31
Brassica_virus_1_Rap	Xinjiang_varicosavirus	39.36
Brassica_virus_1_Rap	lettuce_bigvein_associated_virus	39.36
Brassica_virus_1_Rap	Brassica_virus_2_Inc	39.83
Brassica_virus_1_Rap	Brassica_virus_2_Ole	39.21
Brassica_virus_1_Rap	Brassica_virus_2_Jun	39.06
Brassica_virus_1_Rap	Primula_virus_1	39.78
Brassica_virus_1_Rap	Asclepias_syriaca_virus_3	40.04
Brassica_virus_1_Rap	Picea_virus_1	33.91
Brassica_virus_1_Rap	Pinus_yunnanensis_virus_1	34.79
Brassica_virus_1_Rap	Pinus_flexilis_virus_1	35.19
Brassica_virus_1_Rap	Pinus_banksiana_virus_1	36.11
Brassica_virus_1_Rap	Abies_virus_1	35.24
Brassica_virus_1_Rap	Cupressus_virus_1	35.30
Brassica_virus_1_Rap	Sciadopitys_virus_1_Chi	33.52
Brassica_virus_1_Rap	Sciadopitys_virus_1_Can	33.51
Brassica_virus_1_Rap	Taxus_virus_1	35.12
Brassica_virus_1_Rap	Amentotaxus_virus_1	34.13
Raphanus_virus_1	Erysimum_virus_1	61.02
Raphanus_virus_1	Spinach_virus_1_Tur	52.17
Raphanus_virus_1	Spinach_virus_1_Ole	51.79
Raphanus_virus_1	Silene_virus_1	51.99
Raphanus_virus_1	Triticum_virus_1	51.49
Raphanus_virus_1	red_cloverassociated_Varicosavirus	52.01
Raphanus_virus_1	Mellilotus_virus_1_Alb	51.46
Raphanus_virus_1	Mellilotus_virus_1_Off	51.61
Raphanus_virus_1	Centaurea_virus_1	50.04
Raphanus_virus_1	Aponogeton_virus_1	51.49
Raphanus_virus_1	Tanacetum_virus_1	47.85
Raphanus_virus_1	Leucanthemum_virus_1	48.68
Raphanus_virus_1	Artemisia_virus_1	48.69
Raphanus_virus_1	Caladenia_virus_1	48.55
Raphanus_virus_1	Ribes_virus_1	46.69
Raphanus_virus_1	Arceuthobium_virus_8	43.58
Raphanus_virus_1	Ranunculus_virus_1	43.44
Raphanus_virus_1	Vincetoxicum_virus_1	42.12
Raphanus_virus_1	Aconitum_virus_1	43.54
Raphanus_virus_1	Zostera_associated_varicosavirus_1	42.94
Raphanus_virus_1	Vitis_varicosavirus	42.84
Raphanus_virus_1	Lupinus_virus_1	42.05
Raphanus_virus_1	Apera_virus_1	42.21
Raphanus_virus_1	Guizotia_virus_1	42.74
Raphanus_virus_1	Melampyrum_roseum_virus_1	43.08
Raphanus_virus_1	morning_glory_varicosavirus	42.39
Raphanus_virus_1	Allium_angulosum_virus_1	41.66
Raphanus_virus_1	Lolium_virus_1_Aru	39.01
Raphanus_virus_1	Lolium_virus_1_Per	38.90
Raphanus_virus_1	Alopecurus_myosuroides_varicosavirus_1	38.25
Raphanus_virus_1	Holcus_virus_1	38.94
Raphanus_virus_1	Pennisetum_virus_1	38.66
Raphanus_virus_1	Zea_virus_1	39.40
Raphanus_virus_1	Luffa_virus_1	39.27
Raphanus_virus_1	Cucumis_virus_1	38.98
Raphanus_virus_1	Streptoglossa_virus_1	39.83
Raphanus_virus_1	Frullania_virus_1	40.52
Raphanus_virus_1	Monoclea_gottschei_varicosalike_virus	40.15
Raphanus_virus_1	Didymochlaena_virus_1	41.36
Raphanus_virus_1	tree_fern_varicosalike_virus	42.04
Raphanus_virus_1	Treubia_virus_1	40.50
Raphanus_virus_1	Xinjiang_varicosavirus	38.86
Raphanus_virus_1	lettuce_bigvein_associated_virus	38.37
Raphanus_virus_1	Brassica_virus_2_Inc	38.82
Raphanus_virus_1	Brassica_virus_2_Ole	38.87
Raphanus_virus_1	Brassica_virus_2_Jun	38.77
Raphanus_virus_1	Primula_virus_1	38.78
Raphanus_virus_1	Asclepias_syriaca_virus_3	39.35
Raphanus_virus_1	Picea_virus_1	34.99
Raphanus_virus_1	Pinus_yunnanensis_virus_1	35.14
Raphanus_virus_1	Pinus_flexilis_virus_1	35.24
Raphanus_virus_1	Pinus_banksiana_virus_1	35.02
Raphanus_virus_1	Abies_virus_1	34.78
Raphanus_virus_1	Cupressus_virus_1	33.70
Raphanus_virus_1	Sciadopitys_virus_1_Chi	33.14
Raphanus_virus_1	Sciadopitys_virus_1_Can	33.50
Raphanus_virus_1	Taxus_virus_1	33.74
Raphanus_virus_1	Amentotaxus_virus_1	34.60
Erysimum_virus_1	Spinach_virus_1_Tur	52.96
Erysimum_virus_1	Spinach_virus_1_Ole	52.57
Erysimum_virus_1	Silene_virus_1	50.78
Erysimum_virus_1	Triticum_virus_1	52.51
Erysimum_virus_1	red_cloverassociated_Varicosavirus	52.78
Erysimum_virus_1	Mellilotus_virus_1_Alb	52.53
Erysimum_virus_1	Mellilotus_virus_1_Off	52.70
Erysimum_virus_1	Centaurea_virus_1	50.02
Erysimum_virus_1	Aponogeton_virus_1	52.29
Erysimum_virus_1	Tanacetum_virus_1	48.55
Erysimum_virus_1	Leucanthemum_virus_1	48.67
Erysimum_virus_1	Artemisia_virus_1	49.51
Erysimum_virus_1	Caladenia_virus_1	49.74
Erysimum_virus_1	Ribes_virus_1	48.01
Erysimum_virus_1	Arceuthobium_virus_8	44.75
Erysimum_virus_1	Ranunculus_virus_1	44.34
Erysimum_virus_1	Vincetoxicum_virus_1	43.11
Erysimum_virus_1	Aconitum_virus_1	42.59
Erysimum_virus_1	Zostera_associated_varicosavirus_1	42.59
Erysimum_virus_1	Vitis_varicosavirus	43.45
Erysimum_virus_1	Lupinus_virus_1	42.99
Erysimum_virus_1	Apera_virus_1	43.09
Erysimum_virus_1	Guizotia_virus_1	42.67
Erysimum_virus_1	Melampyrum_roseum_virus_1	43.49
Erysimum_virus_1	morning_glory_varicosavirus	43.17
Erysimum_virus_1	Allium_angulosum_virus_1	41.43
Erysimum_virus_1	Lolium_virus_1_Aru	38.26
Erysimum_virus_1	Lolium_virus_1_Per	38.83
Erysimum_virus_1	Alopecurus_myosuroides_varicosavirus_1	39.78
Erysimum_virus_1	Holcus_virus_1	38.83
Erysimum_virus_1	Pennisetum_virus_1	38.97
Erysimum_virus_1	Zea_virus_1	39.43
Erysimum_virus_1	Luffa_virus_1	39.11
Erysimum_virus_1	Cucumis_virus_1	40.10
Erysimum_virus_1	Streptoglossa_virus_1	40.76
Erysimum_virus_1	Frullania_virus_1	40.97
Erysimum_virus_1	Monoclea_gottschei_varicosalike_virus	40.29
Erysimum_virus_1	Didymochlaena_virus_1	40.72
Erysimum_virus_1	tree_fern_varicosalike_virus	41.26
Erysimum_virus_1	Treubia_virus_1	39.61
Erysimum_virus_1	Xinjiang_varicosavirus	39.65
Erysimum_virus_1	lettuce_bigvein_associated_virus	40.96
Erysimum_virus_1	Brassica_virus_2_Inc	39.81
Erysimum_virus_1	Brassica_virus_2_Ole	39.81
Erysimum_virus_1	Brassica_virus_2_Jun	39.69
Erysimum_virus_1	Primula_virus_1	38.83
Erysimum_virus_1	Asclepias_syriaca_virus_3	39.22
Erysimum_virus_1	Picea_virus_1	33.10
Erysimum_virus_1	Pinus_yunnanensis_virus_1	33.85
Erysimum_virus_1	Pinus_flexilis_virus_1	34.78
Erysimum_virus_1	Pinus_banksiana_virus_1	36.48
Erysimum_virus_1	Abies_virus_1	33.98
Erysimum_virus_1	Cupressus_virus_1	33.95
Erysimum_virus_1	Sciadopitys_virus_1_Chi	32.85
Erysimum_virus_1	Sciadopitys_virus_1_Can	33.23
Erysimum_virus_1	Taxus_virus_1	33.86
Erysimum_virus_1	Amentotaxus_virus_1	34.10
Spinach_virus_1_Tur	Spinach_virus_1_Ole	95.14
Spinach_virus_1_Tur	Silene_virus_1	59.73
Spinach_virus_1_Tur	Triticum_virus_1	54.93
Spinach_virus_1_Tur	red_cloverassociated_Varicosavirus	54.98
Spinach_virus_1_Tur	Mellilotus_virus_1_Alb	53.32
Spinach_virus_1_Tur	Mellilotus_virus_1_Off	53.47
Spinach_virus_1_Tur	Centaurea_virus_1	49.03
Spinach_virus_1_Tur	Aponogeton_virus_1	50.17
Spinach_virus_1_Tur	Tanacetum_virus_1	47.40
Spinach_virus_1_Tur	Leucanthemum_virus_1	47.33
Spinach_virus_1_Tur	Artemisia_virus_1	48.17
Spinach_virus_1_Tur	Caladenia_virus_1	47.91
Spinach_virus_1_Tur	Ribes_virus_1	47.99
Spinach_virus_1_Tur	Arceuthobium_virus_8	43.09
Spinach_virus_1_Tur	Ranunculus_virus_1	42.58
Spinach_virus_1_Tur	Vincetoxicum_virus_1	43.39
Spinach_virus_1_Tur	Aconitum_virus_1	43.73
Spinach_virus_1_Tur	Zostera_associated_varicosavirus_1	42.01
Spinach_virus_1_Tur	Vitis_varicosavirus	42.36
Spinach_virus_1_Tur	Lupinus_virus_1	41.45
Spinach_virus_1_Tur	Apera_virus_1	41.97
Spinach_virus_1_Tur	Guizotia_virus_1	41.88
Spinach_virus_1_Tur	Melampyrum_roseum_virus_1	43.23
Spinach_virus_1_Tur	morning_glory_varicosavirus	41.76
Spinach_virus_1_Tur	Allium_angulosum_virus_1	40.55
Spinach_virus_1_Tur	Lolium_virus_1_Aru	38.35
Spinach_virus_1_Tur	Lolium_virus_1_Per	37.58
Spinach_virus_1_Tur	Alopecurus_myosuroides_varicosavirus_1	37.42
Spinach_virus_1_Tur	Holcus_virus_1	38.64
Spinach_virus_1_Tur	Pennisetum_virus_1	37.86
Spinach_virus_1_Tur	Zea_virus_1	38.64
Spinach_virus_1_Tur	Luffa_virus_1	39.24
Spinach_virus_1_Tur	Cucumis_virus_1	40.30
Spinach_virus_1_Tur	Streptoglossa_virus_1	40.08
Spinach_virus_1_Tur	Frullania_virus_1	39.19
Spinach_virus_1_Tur	Monoclea_gottschei_varicosalike_virus	40.32
Spinach_virus_1_Tur	Didymochlaena_virus_1	39.85
Spinach_virus_1_Tur	tree_fern_varicosalike_virus	40.80
Spinach_virus_1_Tur	Treubia_virus_1	40.10
Spinach_virus_1_Tur	Xinjiang_varicosavirus	38.64
Spinach_virus_1_Tur	lettuce_bigvein_associated_virus	37.79
Spinach_virus_1_Tur	Brassica_virus_2_Inc	38.78
Spinach_virus_1_Tur	Brassica_virus_2_Ole	38.78
Spinach_virus_1_Tur	Brassica_virus_2_Jun	38.68
Spinach_virus_1_Tur	Primula_virus_1	38.82
Spinach_virus_1_Tur	Asclepias_syriaca_virus_3	39.32
Spinach_virus_1_Tur	Picea_virus_1	33.94
Spinach_virus_1_Tur	Pinus_yunnanensis_virus_1	33.35
Spinach_virus_1_Tur	Pinus_flexilis_virus_1	34.38
Spinach_virus_1_Tur	Pinus_banksiana_virus_1	34.13
Spinach_virus_1_Tur	Abies_virus_1	33.62
Spinach_virus_1_Tur	Cupressus_virus_1	33.82
Spinach_virus_1_Tur	Sciadopitys_virus_1_Chi	33.14
Spinach_virus_1_Tur	Sciadopitys_virus_1_Can	33.04
Spinach_virus_1_Tur	Taxus_virus_1	33.09
Spinach_virus_1_Tur	Amentotaxus_virus_1	33.99
Spinach_virus_1_Ole	Silene_virus_1	59.72
Spinach_virus_1_Ole	Triticum_virus_1	55.13
Spinach_virus_1_Ole	red_cloverassociated_Varicosavirus	54.64
Spinach_virus_1_Ole	Mellilotus_virus_1_Alb	53.14
Spinach_virus_1_Ole	Mellilotus_virus_1_Off	53.34
Spinach_virus_1_Ole	Centaurea_virus_1	49.15
Spinach_virus_1_Ole	Aponogeton_virus_1	49.90
Spinach_virus_1_Ole	Tanacetum_virus_1	47.21
Spinach_virus_1_Ole	Leucanthemum_virus_1	47.36
Spinach_virus_1_Ole	Artemisia_virus_1	48.20
Spinach_virus_1_Ole	Caladenia_virus_1	48.47
Spinach_virus_1_Ole	Ribes_virus_1	47.57
Spinach_virus_1_Ole	Arceuthobium_virus_8	42.38
Spinach_virus_1_Ole	Ranunculus_virus_1	42.54
Spinach_virus_1_Ole	Vincetoxicum_virus_1	42.92
Spinach_virus_1_Ole	Aconitum_virus_1	43.39
Spinach_virus_1_Ole	Zostera_associated_varicosavirus_1	41.93
Spinach_virus_1_Ole	Vitis_varicosavirus	42.23
Spinach_virus_1_Ole	Lupinus_virus_1	40.96
Spinach_virus_1_Ole	Apera_virus_1	41.85
Spinach_virus_1_Ole	Guizotia_virus_1	42.03
Spinach_virus_1_Ole	Melampyrum_roseum_virus_1	43.22
Spinach_virus_1_Ole	morning_glory_varicosavirus	41.17
Spinach_virus_1_Ole	Allium_angulosum_virus_1	40.38
Spinach_virus_1_Ole	Lolium_virus_1_Aru	38.17
Spinach_virus_1_Ole	Lolium_virus_1_Per	38.24
Spinach_virus_1_Ole	Alopecurus_myosuroides_varicosavirus_1	37.58
Spinach_virus_1_Ole	Holcus_virus_1	38.80
Spinach_virus_1_Ole	Pennisetum_virus_1	37.34
Spinach_virus_1_Ole	Zea_virus_1	38.26
Spinach_virus_1_Ole	Luffa_virus_1	39.62
Spinach_virus_1_Ole	Cucumis_virus_1	39.93
Spinach_virus_1_Ole	Streptoglossa_virus_1	39.56
Spinach_virus_1_Ole	Frullania_virus_1	39.25
Spinach_virus_1_Ole	Monoclea_gottschei_varicosalike_virus	39.82
Spinach_virus_1_Ole	Didymochlaena_virus_1	39.53
Spinach_virus_1_Ole	tree_fern_varicosalike_virus	40.67
Spinach_virus_1_Ole	Treubia_virus_1	40.04
Spinach_virus_1_Ole	Xinjiang_varicosavirus	39.20
Spinach_virus_1_Ole	lettuce_bigvein_associated_virus	38.26
Spinach_virus_1_Ole	Brassica_virus_2_Inc	38.36
Spinach_virus_1_Ole	Brassica_virus_2_Ole	38.36
Spinach_virus_1_Ole	Brassica_virus_2_Jun	38.41
Spinach_virus_1_Ole	Primula_virus_1	38.29
Spinach_virus_1_Ole	Asclepias_syriaca_virus_3	38.60
Spinach_virus_1_Ole	Picea_virus_1	33.97
Spinach_virus_1_Ole	Pinus_yunnanensis_virus_1	32.96
Spinach_virus_1_Ole	Pinus_flexilis_virus_1	33.77
Spinach_virus_1_Ole	Pinus_banksiana_virus_1	34.71
Spinach_virus_1_Ole	Abies_virus_1	33.85
Spinach_virus_1_Ole	Cupressus_virus_1	33.83
Spinach_virus_1_Ole	Sciadopitys_virus_1_Chi	32.79
Spinach_virus_1_Ole	Sciadopitys_virus_1_Can	32.81
Spinach_virus_1_Ole	Taxus_virus_1	33.02
Spinach_virus_1_Ole	Amentotaxus_virus_1	33.26
Silene_virus_1	Triticum_virus_1	54.04
Silene_virus_1	red_cloverassociated_Varicosavirus	53.57
Silene_virus_1	Mellilotus_virus_1_Alb	53.03
Silene_virus_1	Mellilotus_virus_1_Off	52.53
Silene_virus_1	Centaurea_virus_1	49.57
Silene_virus_1	Aponogeton_virus_1	48.43
Silene_virus_1	Tanacetum_virus_1	46.33
Silene_virus_1	Leucanthemum_virus_1	46.53
Silene_virus_1	Artemisia_virus_1	48.59
Silene_virus_1	Caladenia_virus_1	47.89
Silene_virus_1	Ribes_virus_1	46.39
Silene_virus_1	Arceuthobium_virus_8	41.80
Silene_virus_1	Ranunculus_virus_1	42.05
Silene_virus_1	Vincetoxicum_virus_1	42.69
Silene_virus_1	Aconitum_virus_1	42.07
Silene_virus_1	Zostera_associated_varicosavirus_1	40.97
Silene_virus_1	Vitis_varicosavirus	40.98
Silene_virus_1	Lupinus_virus_1	41.95
Silene_virus_1	Apera_virus_1	41.44
Silene_virus_1	Guizotia_virus_1	42.58
Silene_virus_1	Melampyrum_roseum_virus_1	42.05
Silene_virus_1	morning_glory_varicosavirus	42.37
Silene_virus_1	Allium_angulosum_virus_1	41.53
Silene_virus_1	Lolium_virus_1_Aru	38.76
Silene_virus_1	Lolium_virus_1_Per	38.30
Silene_virus_1	Alopecurus_myosuroides_varicosavirus_1	38.50
Silene_virus_1	Holcus_virus_1	39.12
Silene_virus_1	Pennisetum_virus_1	38.07
Silene_virus_1	Zea_virus_1	39.37
Silene_virus_1	Luffa_virus_1	41.58
Silene_virus_1	Cucumis_virus_1	40.11
Silene_virus_1	Streptoglossa_virus_1	39.82
Silene_virus_1	Frullania_virus_1	39.33
Silene_virus_1	Monoclea_gottschei_varicosalike_virus	40.18
Silene_virus_1	Didymochlaena_virus_1	38.71
Silene_virus_1	tree_fern_varicosalike_virus	41.36
Silene_virus_1	Treubia_virus_1	41.38
Silene_virus_1	Xinjiang_varicosavirus	39.70
Silene_virus_1	lettuce_bigvein_associated_virus	39.00
Silene_virus_1	Brassica_virus_2_Inc	38.62
Silene_virus_1	Brassica_virus_2_Ole	38.67
Silene_virus_1	Brassica_virus_2_Jun	38.54
Silene_virus_1	Primula_virus_1	38.57
Silene_virus_1	Asclepias_syriaca_virus_3	39.76
Silene_virus_1	Picea_virus_1	32.36
Silene_virus_1	Pinus_yunnanensis_virus_1	33.74
Silene_virus_1	Pinus_flexilis_virus_1	34.39
Silene_virus_1	Pinus_banksiana_virus_1	33.46
Silene_virus_1	Abies_virus_1	32.96
Silene_virus_1	Cupressus_virus_1	33.26
Silene_virus_1	Sciadopitys_virus_1_Chi	32.54
Silene_virus_1	Sciadopitys_virus_1_Can	32.49
Silene_virus_1	Taxus_virus_1	34.02
Silene_virus_1	Amentotaxus_virus_1	34.22
Triticum_virus_1	red_cloverassociated_Varicosavirus	72.54
Triticum_virus_1	Mellilotus_virus_1_Alb	63.79
Triticum_virus_1	Mellilotus_virus_1_Off	63.84
Triticum_virus_1	Centaurea_virus_1	50.87
Triticum_virus_1	Aponogeton_virus_1	50.07
Triticum_virus_1	Tanacetum_virus_1	47.83
Triticum_virus_1	Leucanthemum_virus_1	47.76
Triticum_virus_1	Artemisia_virus_1	48.80
Triticum_virus_1	Caladenia_virus_1	49.87
Triticum_virus_1	Ribes_virus_1	47.31
Triticum_virus_1	Arceuthobium_virus_8	43.62
Triticum_virus_1	Ranunculus_virus_1	43.39
Triticum_virus_1	Vincetoxicum_virus_1	42.01
Triticum_virus_1	Aconitum_virus_1	42.75
Triticum_virus_1	Zostera_associated_varicosavirus_1	41.85
Triticum_virus_1	Vitis_varicosavirus	42.15
Triticum_virus_1	Lupinus_virus_1	42.96
Triticum_virus_1	Apera_virus_1	42.42
Triticum_virus_1	Guizotia_virus_1	42.60
Triticum_virus_1	Melampyrum_roseum_virus_1	42.66
Triticum_virus_1	morning_glory_varicosavirus	42.24
Triticum_virus_1	Allium_angulosum_virus_1	42.61
Triticum_virus_1	Lolium_virus_1_Aru	39.13
Triticum_virus_1	Lolium_virus_1_Per	39.28
Triticum_virus_1	Alopecurus_myosuroides_varicosavirus_1	37.97
Triticum_virus_1	Holcus_virus_1	39.75
Triticum_virus_1	Pennisetum_virus_1	39.58
Triticum_virus_1	Zea_virus_1	39.30
Triticum_virus_1	Luffa_virus_1	40.42
Triticum_virus_1	Cucumis_virus_1	39.85
Triticum_virus_1	Streptoglossa_virus_1	40.87
Triticum_virus_1	Frullania_virus_1	39.68
Triticum_virus_1	Monoclea_gottschei_varicosalike_virus	40.76
Triticum_virus_1	Didymochlaena_virus_1	40.68
Triticum_virus_1	tree_fern_varicosalike_virus	42.52
Triticum_virus_1	Treubia_virus_1	41.09
Triticum_virus_1	Xinjiang_varicosavirus	39.21
Triticum_virus_1	lettuce_bigvein_associated_virus	38.26
Triticum_virus_1	Brassica_virus_2_Inc	39.79
Triticum_virus_1	Brassica_virus_2_Ole	40.06
Triticum_virus_1	Brassica_virus_2_Jun	39.86
Triticum_virus_1	Primula_virus_1	39.01
Triticum_virus_1	Asclepias_syriaca_virus_3	38.88
Triticum_virus_1	Picea_virus_1	32.61
Triticum_virus_1	Pinus_yunnanensis_virus_1	32.85
Triticum_virus_1	Pinus_flexilis_virus_1	33.70
Triticum_virus_1	Pinus_banksiana_virus_1	33.58
Triticum_virus_1	Abies_virus_1	32.46
Triticum_virus_1	Cupressus_virus_1	33.23
Triticum_virus_1	Sciadopitys_virus_1_Chi	34.47
Triticum_virus_1	Sciadopitys_virus_1_Can	33.38
Triticum_virus_1	Taxus_virus_1	32.39
Triticum_virus_1	Amentotaxus_virus_1	33.70
red_cloverassociated_Varicosavirus	Mellilotus_virus_1_Alb	64.71
red_cloverassociated_Varicosavirus	Mellilotus_virus_1_Off	65.11
red_cloverassociated_Varicosavirus	Centaurea_virus_1	49.77
red_cloverassociated_Varicosavirus	Aponogeton_virus_1	50.39
red_cloverassociated_Varicosavirus	Tanacetum_virus_1	47.57
red_cloverassociated_Varicosavirus	Leucanthemum_virus_1	47.10
red_cloverassociated_Varicosavirus	Artemisia_virus_1	47.68
red_cloverassociated_Varicosavirus	Caladenia_virus_1	49.87
red_cloverassociated_Varicosavirus	Ribes_virus_1	47.53
red_cloverassociated_Varicosavirus	Arceuthobium_virus_8	43.11
red_cloverassociated_Varicosavirus	Ranunculus_virus_1	41.62
red_cloverassociated_Varicosavirus	Vincetoxicum_virus_1	41.95
red_cloverassociated_Varicosavirus	Aconitum_virus_1	41.76
red_cloverassociated_Varicosavirus	Zostera_associated_varicosavirus_1	40.99
red_cloverassociated_Varicosavirus	Vitis_varicosavirus	41.01
red_cloverassociated_Varicosavirus	Lupinus_virus_1	42.55
red_cloverassociated_Varicosavirus	Apera_virus_1	42.29
red_cloverassociated_Varicosavirus	Guizotia_virus_1	42.18
red_cloverassociated_Varicosavirus	Melampyrum_roseum_virus_1	42.35
red_cloverassociated_Varicosavirus	morning_glory_varicosavirus	42.20
red_cloverassociated_Varicosavirus	Allium_angulosum_virus_1	40.75
red_cloverassociated_Varicosavirus	Lolium_virus_1_Aru	39.79
red_cloverassociated_Varicosavirus	Lolium_virus_1_Per	39.10
red_cloverassociated_Varicosavirus	Alopecurus_myosuroides_varicosavirus_1	38.31
red_cloverassociated_Varicosavirus	Holcus_virus_1	38.74
red_cloverassociated_Varicosavirus	Pennisetum_virus_1	39.43
red_cloverassociated_Varicosavirus	Zea_virus_1	38.25
red_cloverassociated_Varicosavirus	Luffa_virus_1	40.68
red_cloverassociated_Varicosavirus	Cucumis_virus_1	40.20
red_cloverassociated_Varicosavirus	Streptoglossa_virus_1	40.11
red_cloverassociated_Varicosavirus	Frullania_virus_1	39.69
red_cloverassociated_Varicosavirus	Monoclea_gottschei_varicosalike_virus	39.28
red_cloverassociated_Varicosavirus	Didymochlaena_virus_1	40.32
red_cloverassociated_Varicosavirus	tree_fern_varicosalike_virus	41.52
red_cloverassociated_Varicosavirus	Treubia_virus_1	40.43
red_cloverassociated_Varicosavirus	Xinjiang_varicosavirus	39.89
red_cloverassociated_Varicosavirus	lettuce_bigvein_associated_virus	38.58
red_cloverassociated_Varicosavirus	Brassica_virus_2_Inc	39.89
red_cloverassociated_Varicosavirus	Brassica_virus_2_Ole	39.89
red_cloverassociated_Varicosavirus	Brassica_virus_2_Jun	39.38
red_cloverassociated_Varicosavirus	Primula_virus_1	38.63
red_cloverassociated_Varicosavirus	Asclepias_syriaca_virus_3	38.73
red_cloverassociated_Varicosavirus	Picea_virus_1	31.95
red_cloverassociated_Varicosavirus	Pinus_yunnanensis_virus_1	33.01
red_cloverassociated_Varicosavirus	Pinus_flexilis_virus_1	33.75
red_cloverassociated_Varicosavirus	Pinus_banksiana_virus_1	33.65
red_cloverassociated_Varicosavirus	Abies_virus_1	33.52
red_cloverassociated_Varicosavirus	Cupressus_virus_1	34.51
red_cloverassociated_Varicosavirus	Sciadopitys_virus_1_Chi	33.31
red_cloverassociated_Varicosavirus	Sciadopitys_virus_1_Can	33.16
red_cloverassociated_Varicosavirus	Taxus_virus_1	33.57
red_cloverassociated_Varicosavirus	Amentotaxus_virus_1	34.25
Mellilotus_virus_1_Alb	Mellilotus_virus_1_Off	91.67
Mellilotus_virus_1_Alb	Centaurea_virus_1	49.50
Mellilotus_virus_1_Alb	Aponogeton_virus_1	49.70
Mellilotus_virus_1_Alb	Tanacetum_virus_1	46.93
Mellilotus_virus_1_Alb	Leucanthemum_virus_1	48.27
Mellilotus_virus_1_Alb	Artemisia_virus_1	48.32
Mellilotus_virus_1_Alb	Caladenia_virus_1	48.97
Mellilotus_virus_1_Alb	Ribes_virus_1	46.85
Mellilotus_virus_1_Alb	Arceuthobium_virus_8	42.63
Mellilotus_virus_1_Alb	Ranunculus_virus_1	42.90
Mellilotus_virus_1_Alb	Vincetoxicum_virus_1	42.17
Mellilotus_virus_1_Alb	Aconitum_virus_1	42.41
Mellilotus_virus_1_Alb	Zostera_associated_varicosavirus_1	40.60
Mellilotus_virus_1_Alb	Vitis_varicosavirus	42.20
Mellilotus_virus_1_Alb	Lupinus_virus_1	41.67
Mellilotus_virus_1_Alb	Apera_virus_1	43.38
Mellilotus_virus_1_Alb	Guizotia_virus_1	42.55
Mellilotus_virus_1_Alb	Melampyrum_roseum_virus_1	42.95
Mellilotus_virus_1_Alb	morning_glory_varicosavirus	41.50
Mellilotus_virus_1_Alb	Allium_angulosum_virus_1	40.77
Mellilotus_virus_1_Alb	Lolium_virus_1_Aru	37.65
Mellilotus_virus_1_Alb	Lolium_virus_1_Per	37.42
Mellilotus_virus_1_Alb	Alopecurus_myosuroides_varicosavirus_1	36.86
Mellilotus_virus_1_Alb	Holcus_virus_1	38.30
Mellilotus_virus_1_Alb	Pennisetum_virus_1	39.09
Mellilotus_virus_1_Alb	Zea_virus_1	37.84
Mellilotus_virus_1_Alb	Luffa_virus_1	40.31
Mellilotus_virus_1_Alb	Cucumis_virus_1	40.10
Mellilotus_virus_1_Alb	Streptoglossa_virus_1	39.33
Mellilotus_virus_1_Alb	Frullania_virus_1	39.09
Mellilotus_virus_1_Alb	Monoclea_gottschei_varicosalike_virus	38.84
Mellilotus_virus_1_Alb	Didymochlaena_virus_1	40.40
Mellilotus_virus_1_Alb	tree_fern_varicosalike_virus	40.14
Mellilotus_virus_1_Alb	Treubia_virus_1	39.95
Mellilotus_virus_1_Alb	Xinjiang_varicosavirus	37.70
Mellilotus_virus_1_Alb	lettuce_bigvein_associated_virus	37.82
Mellilotus_virus_1_Alb	Brassica_virus_2_Inc	39.50
Mellilotus_virus_1_Alb	Brassica_virus_2_Ole	39.47
Mellilotus_virus_1_Alb	Brassica_virus_2_Jun	39.20
Mellilotus_virus_1_Alb	Primula_virus_1	38.49
Mellilotus_virus_1_Alb	Asclepias_syriaca_virus_3	38.73
Mellilotus_virus_1_Alb	Picea_virus_1	33.04
Mellilotus_virus_1_Alb	Pinus_yunnanensis_virus_1	33.96
Mellilotus_virus_1_Alb	Pinus_flexilis_virus_1	34.15
Mellilotus_virus_1_Alb	Pinus_banksiana_virus_1	33.19
Mellilotus_virus_1_Alb	Abies_virus_1	32.90
Mellilotus_virus_1_Alb	Cupressus_virus_1	33.09
Mellilotus_virus_1_Alb	Sciadopitys_virus_1_Chi	33.11
Mellilotus_virus_1_Alb	Sciadopitys_virus_1_Can	33.21
Mellilotus_virus_1_Alb	Taxus_virus_1	33.46
Mellilotus_virus_1_Alb	Amentotaxus_virus_1	33.36
Mellilotus_virus_1_Off	Centaurea_virus_1	49.05
Mellilotus_virus_1_Off	Aponogeton_virus_1	49.45
Mellilotus_virus_1_Off	Tanacetum_virus_1	47.11
Mellilotus_virus_1_Off	Leucanthemum_virus_1	47.85
Mellilotus_virus_1_Off	Artemisia_virus_1	47.81
Mellilotus_virus_1_Off	Caladenia_virus_1	48.34
Mellilotus_virus_1_Off	Ribes_virus_1	47.32
Mellilotus_virus_1_Off	Arceuthobium_virus_8	42.57
Mellilotus_virus_1_Off	Ranunculus_virus_1	42.45
Mellilotus_virus_1_Off	Vincetoxicum_virus_1	42.69
Mellilotus_virus_1_Off	Aconitum_virus_1	41.78
Mellilotus_virus_1_Off	Zostera_associated_varicosavirus_1	40.86
Mellilotus_virus_1_Off	Vitis_varicosavirus	41.97
Mellilotus_virus_1_Off	Lupinus_virus_1	42.19
Mellilotus_virus_1_Off	Apera_virus_1	43.09
Mellilotus_virus_1_Off	Guizotia_virus_1	42.55
Mellilotus_virus_1_Off	Melampyrum_roseum_virus_1	42.77
Mellilotus_virus_1_Off	morning_glory_varicosavirus	41.58
Mellilotus_virus_1_Off	Allium_angulosum_virus_1	41.34
Mellilotus_virus_1_Off	Lolium_virus_1_Aru	37.83
Mellilotus_virus_1_Off	Lolium_virus_1_Per	37.89
Mellilotus_virus_1_Off	Alopecurus_myosuroides_varicosavirus_1	37.24
Mellilotus_virus_1_Off	Holcus_virus_1	38.96
Mellilotus_virus_1_Off	Pennisetum_virus_1	38.37
Mellilotus_virus_1_Off	Zea_virus_1	38.39
Mellilotus_virus_1_Off	Luffa_virus_1	40.49
Mellilotus_virus_1_Off	Cucumis_virus_1	40.34
Mellilotus_virus_1_Off	Streptoglossa_virus_1	39.89
Mellilotus_virus_1_Off	Frullania_virus_1	39.66
Mellilotus_virus_1_Off	Monoclea_gottschei_varicosalike_virus	39.65
Mellilotus_virus_1_Off	Didymochlaena_virus_1	40.71
Mellilotus_virus_1_Off	tree_fern_varicosalike_virus	40.88
Mellilotus_virus_1_Off	Treubia_virus_1	39.67
Mellilotus_virus_1_Off	Xinjiang_varicosavirus	37.69
Mellilotus_virus_1_Off	lettuce_bigvein_associated_virus	37.65
Mellilotus_virus_1_Off	Brassica_virus_2_Inc	39.40
Mellilotus_virus_1_Off	Brassica_virus_2_Ole	39.37
Mellilotus_virus_1_Off	Brassica_virus_2_Jun	39.03
Mellilotus_virus_1_Off	Primula_virus_1	38.57
Mellilotus_virus_1_Off	Asclepias_syriaca_virus_3	38.10
Mellilotus_virus_1_Off	Picea_virus_1	32.94
Mellilotus_virus_1_Off	Pinus_yunnanensis_virus_1	35.09
Mellilotus_virus_1_Off	Pinus_flexilis_virus_1	34.15
Mellilotus_virus_1_Off	Pinus_banksiana_virus_1	33.12
Mellilotus_virus_1_Off	Abies_virus_1	33.68
Mellilotus_virus_1_Off	Cupressus_virus_1	33.13
Mellilotus_virus_1_Off	Sciadopitys_virus_1_Chi	33.01
Mellilotus_virus_1_Off	Sciadopitys_virus_1_Can	33.21
Mellilotus_virus_1_Off	Taxus_virus_1	32.77
Mellilotus_virus_1_Off	Amentotaxus_virus_1	33.46
Centaurea_virus_1	Aponogeton_virus_1	48.60
Centaurea_virus_1	Tanacetum_virus_1	46.95
Centaurea_virus_1	Leucanthemum_virus_1	47.25
Centaurea_virus_1	Artemisia_virus_1	45.87
Centaurea_virus_1	Caladenia_virus_1	47.89
Centaurea_virus_1	Ribes_virus_1	45.20
Centaurea_virus_1	Arceuthobium_virus_8	41.51
Centaurea_virus_1	Ranunculus_virus_1	42.45
Centaurea_virus_1	Vincetoxicum_virus_1	41.07
Centaurea_virus_1	Aconitum_virus_1	40.53
Centaurea_virus_1	Zostera_associated_varicosavirus_1	41.70
Centaurea_virus_1	Vitis_varicosavirus	40.75
Centaurea_virus_1	Lupinus_virus_1	40.28
Centaurea_virus_1	Apera_virus_1	41.30
Centaurea_virus_1	Guizotia_virus_1	43.21
Centaurea_virus_1	Melampyrum_roseum_virus_1	41.50
Centaurea_virus_1	morning_glory_varicosavirus	41.32
Centaurea_virus_1	Allium_angulosum_virus_1	40.98
Centaurea_virus_1	Lolium_virus_1_Aru	38.30
Centaurea_virus_1	Lolium_virus_1_Per	38.30
Centaurea_virus_1	Alopecurus_myosuroides_varicosavirus_1	39.53
Centaurea_virus_1	Holcus_virus_1	38.92
Centaurea_virus_1	Pennisetum_virus_1	38.22
Centaurea_virus_1	Zea_virus_1	38.97
Centaurea_virus_1	Luffa_virus_1	39.38
Centaurea_virus_1	Cucumis_virus_1	39.43
Centaurea_virus_1	Streptoglossa_virus_1	41.26
Centaurea_virus_1	Frullania_virus_1	40.57
Centaurea_virus_1	Monoclea_gottschei_varicosalike_virus	39.67
Centaurea_virus_1	Didymochlaena_virus_1	40.87
Centaurea_virus_1	tree_fern_varicosalike_virus	40.94
Centaurea_virus_1	Treubia_virus_1	40.34
Centaurea_virus_1	Xinjiang_varicosavirus	37.99
Centaurea_virus_1	lettuce_bigvein_associated_virus	37.47
Centaurea_virus_1	Brassica_virus_2_Inc	38.18
Centaurea_virus_1	Brassica_virus_2_Ole	38.18
Centaurea_virus_1	Brassica_virus_2_Jun	38.35
Centaurea_virus_1	Primula_virus_1	37.60
Centaurea_virus_1	Asclepias_syriaca_virus_3	38.59
Centaurea_virus_1	Picea_virus_1	32.27
Centaurea_virus_1	Pinus_yunnanensis_virus_1	32.97
Centaurea_virus_1	Pinus_flexilis_virus_1	32.23
Centaurea_virus_1	Pinus_banksiana_virus_1	33.29
Centaurea_virus_1	Abies_virus_1	34.42
Centaurea_virus_1	Cupressus_virus_1	32.26
Centaurea_virus_1	Sciadopitys_virus_1_Chi	32.77
Centaurea_virus_1	Sciadopitys_virus_1_Can	32.65
Centaurea_virus_1	Taxus_virus_1	33.71
Centaurea_virus_1	Amentotaxus_virus_1	34.04
Aponogeton_virus_1	Tanacetum_virus_1	48.01
Aponogeton_virus_1	Leucanthemum_virus_1	47.87
Aponogeton_virus_1	Artemisia_virus_1	47.06
Aponogeton_virus_1	Caladenia_virus_1	49.82
Aponogeton_virus_1	Ribes_virus_1	48.99
Aponogeton_virus_1	Arceuthobium_virus_8	44.11
Aponogeton_virus_1	Ranunculus_virus_1	42.55
Aponogeton_virus_1	Vincetoxicum_virus_1	42.11
Aponogeton_virus_1	Aconitum_virus_1	43.34
Aponogeton_virus_1	Zostera_associated_varicosavirus_1	42.61
Aponogeton_virus_1	Vitis_varicosavirus	43.08
Aponogeton_virus_1	Lupinus_virus_1	42.40
Aponogeton_virus_1	Apera_virus_1	42.48
Aponogeton_virus_1	Guizotia_virus_1	43.03
Aponogeton_virus_1	Melampyrum_roseum_virus_1	43.65
Aponogeton_virus_1	morning_glory_varicosavirus	42.29
Aponogeton_virus_1	Allium_angulosum_virus_1	41.61
Aponogeton_virus_1	Lolium_virus_1_Aru	38.09
Aponogeton_virus_1	Lolium_virus_1_Per	38.20
Aponogeton_virus_1	Alopecurus_myosuroides_varicosavirus_1	38.73
Aponogeton_virus_1	Holcus_virus_1	39.51
Aponogeton_virus_1	Pennisetum_virus_1	39.30
Aponogeton_virus_1	Zea_virus_1	38.67
Aponogeton_virus_1	Luffa_virus_1	40.20
Aponogeton_virus_1	Cucumis_virus_1	40.11
Aponogeton_virus_1	Streptoglossa_virus_1	40.89
Aponogeton_virus_1	Frullania_virus_1	41.21
Aponogeton_virus_1	Monoclea_gottschei_varicosalike_virus	40.89
Aponogeton_virus_1	Didymochlaena_virus_1	40.75
Aponogeton_virus_1	tree_fern_varicosalike_virus	40.99
Aponogeton_virus_1	Treubia_virus_1	40.52
Aponogeton_virus_1	Xinjiang_varicosavirus	39.05
Aponogeton_virus_1	lettuce_bigvein_associated_virus	37.78
Aponogeton_virus_1	Brassica_virus_2_Inc	39.55
Aponogeton_virus_1	Brassica_virus_2_Ole	39.47
Aponogeton_virus_1	Brassica_virus_2_Jun	39.56
Aponogeton_virus_1	Primula_virus_1	39.88
Aponogeton_virus_1	Asclepias_syriaca_virus_3	39.75
Aponogeton_virus_1	Picea_virus_1	33.02
Aponogeton_virus_1	Pinus_yunnanensis_virus_1	34.53
Aponogeton_virus_1	Pinus_flexilis_virus_1	34.27
Aponogeton_virus_1	Pinus_banksiana_virus_1	34.10
Aponogeton_virus_1	Abies_virus_1	34.25
Aponogeton_virus_1	Cupressus_virus_1	33.63
Aponogeton_virus_1	Sciadopitys_virus_1_Chi	33.43
Aponogeton_virus_1	Sciadopitys_virus_1_Can	33.87
Aponogeton_virus_1	Taxus_virus_1	33.40
Aponogeton_virus_1	Amentotaxus_virus_1	34.62
Tanacetum_virus_1	Leucanthemum_virus_1	70.49
Tanacetum_virus_1	Artemisia_virus_1	65.64
Tanacetum_virus_1	Caladenia_virus_1	52.55
Tanacetum_virus_1	Ribes_virus_1	48.03
Tanacetum_virus_1	Arceuthobium_virus_8	43.63
Tanacetum_virus_1	Ranunculus_virus_1	42.83
Tanacetum_virus_1	Vincetoxicum_virus_1	42.76
Tanacetum_virus_1	Aconitum_virus_1	41.54
Tanacetum_virus_1	Zostera_associated_varicosavirus_1	41.89
Tanacetum_virus_1	Vitis_varicosavirus	42.34
Tanacetum_virus_1	Lupinus_virus_1	42.18
Tanacetum_virus_1	Apera_virus_1	42.39
Tanacetum_virus_1	Guizotia_virus_1	42.53
Tanacetum_virus_1	Melampyrum_roseum_virus_1	42.45
Tanacetum_virus_1	morning_glory_varicosavirus	42.64
Tanacetum_virus_1	Allium_angulosum_virus_1	41.50
Tanacetum_virus_1	Lolium_virus_1_Aru	38.27
Tanacetum_virus_1	Lolium_virus_1_Per	38.01
Tanacetum_virus_1	Alopecurus_myosuroides_varicosavirus_1	37.35
Tanacetum_virus_1	Holcus_virus_1	39.02
Tanacetum_virus_1	Pennisetum_virus_1	37.56
Tanacetum_virus_1	Zea_virus_1	37.58
Tanacetum_virus_1	Luffa_virus_1	39.21
Tanacetum_virus_1	Cucumis_virus_1	38.69
Tanacetum_virus_1	Streptoglossa_virus_1	40.37
Tanacetum_virus_1	Frullania_virus_1	39.40
Tanacetum_virus_1	Monoclea_gottschei_varicosalike_virus	40.52
Tanacetum_virus_1	Didymochlaena_virus_1	39.21
Tanacetum_virus_1	tree_fern_varicosalike_virus	39.18
Tanacetum_virus_1	Treubia_virus_1	39.33
Tanacetum_virus_1	Xinjiang_varicosavirus	37.63
Tanacetum_virus_1	lettuce_bigvein_associated_virus	38.91
Tanacetum_virus_1	Brassica_virus_2_Inc	39.07
Tanacetum_virus_1	Brassica_virus_2_Ole	39.08
Tanacetum_virus_1	Brassica_virus_2_Jun	38.69
Tanacetum_virus_1	Primula_virus_1	39.97
Tanacetum_virus_1	Asclepias_syriaca_virus_3	39.16
Tanacetum_virus_1	Picea_virus_1	33.23
Tanacetum_virus_1	Pinus_yunnanensis_virus_1	32.79
Tanacetum_virus_1	Pinus_flexilis_virus_1	33.89
Tanacetum_virus_1	Pinus_banksiana_virus_1	33.80
Tanacetum_virus_1	Abies_virus_1	34.03
Tanacetum_virus_1	Cupressus_virus_1	32.82
Tanacetum_virus_1	Sciadopitys_virus_1_Chi	32.46
Tanacetum_virus_1	Sciadopitys_virus_1_Can	32.84
Tanacetum_virus_1	Taxus_virus_1	32.06
Tanacetum_virus_1	Amentotaxus_virus_1	34.13
Leucanthemum_virus_1	Artemisia_virus_1	64.17
Leucanthemum_virus_1	Caladenia_virus_1	52.40
Leucanthemum_virus_1	Ribes_virus_1	46.87
Leucanthemum_virus_1	Arceuthobium_virus_8	43.54
Leucanthemum_virus_1	Ranunculus_virus_1	43.46
Leucanthemum_virus_1	Vincetoxicum_virus_1	42.31
Leucanthemum_virus_1	Aconitum_virus_1	42.54
Leucanthemum_virus_1	Zostera_associated_varicosavirus_1	42.95
Leucanthemum_virus_1	Vitis_varicosavirus	41.89
Leucanthemum_virus_1	Lupinus_virus_1	42.85
Leucanthemum_virus_1	Apera_virus_1	42.75
Leucanthemum_virus_1	Guizotia_virus_1	43.50
Leucanthemum_virus_1	Melampyrum_roseum_virus_1	42.84
Leucanthemum_virus_1	morning_glory_varicosavirus	42.22
Leucanthemum_virus_1	Allium_angulosum_virus_1	41.88
Leucanthemum_virus_1	Lolium_virus_1_Aru	38.70
Leucanthemum_virus_1	Lolium_virus_1_Per	39.02
Leucanthemum_virus_1	Alopecurus_myosuroides_varicosavirus_1	37.65
Leucanthemum_virus_1	Holcus_virus_1	39.24
Leucanthemum_virus_1	Pennisetum_virus_1	37.26
Leucanthemum_virus_1	Zea_virus_1	38.35
Leucanthemum_virus_1	Luffa_virus_1	38.77
Leucanthemum_virus_1	Cucumis_virus_1	39.33
Leucanthemum_virus_1	Streptoglossa_virus_1	41.10
Leucanthemum_virus_1	Frullania_virus_1	38.22
Leucanthemum_virus_1	Monoclea_gottschei_varicosalike_virus	39.74
Leucanthemum_virus_1	Didymochlaena_virus_1	38.84
Leucanthemum_virus_1	tree_fern_varicosalike_virus	39.34
Leucanthemum_virus_1	Treubia_virus_1	39.45
Leucanthemum_virus_1	Xinjiang_varicosavirus	38.34
Leucanthemum_virus_1	lettuce_bigvein_associated_virus	37.71
Leucanthemum_virus_1	Brassica_virus_2_Inc	40.33
Leucanthemum_virus_1	Brassica_virus_2_Ole	40.24
Leucanthemum_virus_1	Brassica_virus_2_Jun	39.94
Leucanthemum_virus_1	Primula_virus_1	41.04
Leucanthemum_virus_1	Asclepias_syriaca_virus_3	38.07
Leucanthemum_virus_1	Picea_virus_1	33.45
Leucanthemum_virus_1	Pinus_yunnanensis_virus_1	33.85
Leucanthemum_virus_1	Pinus_flexilis_virus_1	34.04
Leucanthemum_virus_1	Pinus_banksiana_virus_1	33.79
Leucanthemum_virus_1	Abies_virus_1	34.92
Leucanthemum_virus_1	Cupressus_virus_1	32.67
Leucanthemum_virus_1	Sciadopitys_virus_1_Chi	33.60
Leucanthemum_virus_1	Sciadopitys_virus_1_Can	33.29
Leucanthemum_virus_1	Taxus_virus_1	32.25
Leucanthemum_virus_1	Amentotaxus_virus_1	34.51
Artemisia_virus_1	Caladenia_virus_1	55.15
Artemisia_virus_1	Ribes_virus_1	48.06
Artemisia_virus_1	Arceuthobium_virus_8	43.41
Artemisia_virus_1	Ranunculus_virus_1	43.74
Artemisia_virus_1	Vincetoxicum_virus_1	43.06
Artemisia_virus_1	Aconitum_virus_1	42.50
Artemisia_virus_1	Zostera_associated_varicosavirus_1	42.32
Artemisia_virus_1	Vitis_varicosavirus	41.69
Artemisia_virus_1	Lupinus_virus_1	43.22
Artemisia_virus_1	Apera_virus_1	42.80
Artemisia_virus_1	Guizotia_virus_1	42.70
Artemisia_virus_1	Melampyrum_roseum_virus_1	42.39
Artemisia_virus_1	morning_glory_varicosavirus	42.85
Artemisia_virus_1	Allium_angulosum_virus_1	42.35
Artemisia_virus_1	Lolium_virus_1_Aru	38.29
Artemisia_virus_1	Lolium_virus_1_Per	37.92
Artemisia_virus_1	Alopecurus_myosuroides_varicosavirus_1	37.56
Artemisia_virus_1	Holcus_virus_1	38.83
Artemisia_virus_1	Pennisetum_virus_1	37.80
Artemisia_virus_1	Zea_virus_1	38.67
Artemisia_virus_1	Luffa_virus_1	39.17
Artemisia_virus_1	Cucumis_virus_1	39.61
Artemisia_virus_1	Streptoglossa_virus_1	39.70
Artemisia_virus_1	Frullania_virus_1	38.41
Artemisia_virus_1	Monoclea_gottschei_varicosalike_virus	39.60
Artemisia_virus_1	Didymochlaena_virus_1	39.78
Artemisia_virus_1	tree_fern_varicosalike_virus	40.12
Artemisia_virus_1	Treubia_virus_1	39.26
Artemisia_virus_1	Xinjiang_varicosavirus	37.80
Artemisia_virus_1	lettuce_bigvein_associated_virus	38.96
Artemisia_virus_1	Brassica_virus_2_Inc	40.15
Artemisia_virus_1	Brassica_virus_2_Ole	40.15
Artemisia_virus_1	Brassica_virus_2_Jun	39.84
Artemisia_virus_1	Primula_virus_1	40.12
Artemisia_virus_1	Asclepias_syriaca_virus_3	38.94
Artemisia_virus_1	Picea_virus_1	33.11
Artemisia_virus_1	Pinus_yunnanensis_virus_1	33.52
Artemisia_virus_1	Pinus_flexilis_virus_1	35.16
Artemisia_virus_1	Pinus_banksiana_virus_1	33.43
Artemisia_virus_1	Abies_virus_1	34.37
Artemisia_virus_1	Cupressus_virus_1	32.94
Artemisia_virus_1	Sciadopitys_virus_1_Chi	32.89
Artemisia_virus_1	Sciadopitys_virus_1_Can	32.73
Artemisia_virus_1	Taxus_virus_1	32.85
Artemisia_virus_1	Amentotaxus_virus_1	33.29
Caladenia_virus_1	Ribes_virus_1	47.69
Caladenia_virus_1	Arceuthobium_virus_8	43.01
Caladenia_virus_1	Ranunculus_virus_1	42.61
Caladenia_virus_1	Vincetoxicum_virus_1	41.86
Caladenia_virus_1	Aconitum_virus_1	41.64
Caladenia_virus_1	Zostera_associated_varicosavirus_1	42.38
Caladenia_virus_1	Vitis_varicosavirus	41.80
Caladenia_virus_1	Lupinus_virus_1	41.86
Caladenia_virus_1	Apera_virus_1	41.79
Caladenia_virus_1	Guizotia_virus_1	43.37
Caladenia_virus_1	Melampyrum_roseum_virus_1	42.22
Caladenia_virus_1	morning_glory_varicosavirus	43.25
Caladenia_virus_1	Allium_angulosum_virus_1	41.30
Caladenia_virus_1	Lolium_virus_1_Aru	38.90
Caladenia_virus_1	Lolium_virus_1_Per	39.20
Caladenia_virus_1	Alopecurus_myosuroides_varicosavirus_1	38-40
Caladenia_virus_1	Holcus_virus_1	39.97
Caladenia_virus_1	Pennisetum_virus_1	39.56
Caladenia_virus_1	Zea_virus_1	40.32
Caladenia_virus_1	Luffa_virus_1	40.57
Caladenia_virus_1	Cucumis_virus_1	41.22
Caladenia_virus_1	Streptoglossa_virus_1	42.01
Caladenia_virus_1	Frullania_virus_1	41.18
Caladenia_virus_1	Monoclea_gottschei_varicosalike_virus	40.76
Caladenia_virus_1	Didymochlaena_virus_1	40.71
Caladenia_virus_1	tree_fern_varicosalike_virus	41.01
Caladenia_virus_1	Treubia_virus_1	40.41
Caladenia_virus_1	Xinjiang_varicosavirus	37.92
Caladenia_virus_1	lettuce_bigvein_associated_virus	39.73
Caladenia_virus_1	Brassica_virus_2_Inc	39.34
Caladenia_virus_1	Brassica_virus_2_Ole	39.63
Caladenia_virus_1	Brassica_virus_2_Jun	38.85
Caladenia_virus_1	Primula_virus_1	39.24
Caladenia_virus_1	Asclepias_syriaca_virus_3	39.03
Caladenia_virus_1	Picea_virus_1	33.09
Caladenia_virus_1	Pinus_yunnanensis_virus_1	33.40
Caladenia_virus_1	Pinus_flexilis_virus_1	32.20
Caladenia_virus_1	Pinus_banksiana_virus_1	33.55
Caladenia_virus_1	Abies_virus_1	33.21
Caladenia_virus_1	Cupressus_virus_1	32.43
Caladenia_virus_1	Sciadopitys_virus_1_Chi	33.06
Caladenia_virus_1	Sciadopitys_virus_1_Can	33.70
Caladenia_virus_1	Taxus_virus_1	33.16
Caladenia_virus_1	Amentotaxus_virus_1	33.82
Ribes_virus_1	Arceuthobium_virus_8	44.79
Ribes_virus_1	Ranunculus_virus_1	45.52
Ribes_virus_1	Vincetoxicum_virus_1	44.34
Ribes_virus_1	Aconitum_virus_1	44.86
Ribes_virus_1	Zostera_associated_varicosavirus_1	44.63
Ribes_virus_1	Vitis_varicosavirus	44.43
Ribes_virus_1	Lupinus_virus_1	44.71
Ribes_virus_1	Apera_virus_1	43.08
Ribes_virus_1	Guizotia_virus_1	44.67
Ribes_virus_1	Melampyrum_roseum_virus_1	44.66
Ribes_virus_1	morning_glory_varicosavirus	45.79
Ribes_virus_1	Allium_angulosum_virus_1	41.88
Ribes_virus_1	Lolium_virus_1_Aru	38.94
Ribes_virus_1	Lolium_virus_1_Per	38.91
Ribes_virus_1	Alopecurus_myosuroides_varicosavirus_1	38.28
Ribes_virus_1	Holcus_virus_1	38.79
Ribes_virus_1	Pennisetum_virus_1	40.19
Ribes_virus_1	Zea_virus_1	39.23
Ribes_virus_1	Luffa_virus_1	41.80
Ribes_virus_1	Cucumis_virus_1	41.68
Ribes_virus_1	Streptoglossa_virus_1	42.26
Ribes_virus_1	Frullania_virus_1	40.51
Ribes_virus_1	Monoclea_gottschei_varicosalike_virus	41.71
Ribes_virus_1	Didymochlaena_virus_1	40.71
Ribes_virus_1	tree_fern_varicosalike_virus	41.38
Ribes_virus_1	Treubia_virus_1	40.35
Ribes_virus_1	Xinjiang_varicosavirus	37.83
Ribes_virus_1	lettuce_bigvein_associated_virus	39.28
Ribes_virus_1	Brassica_virus_2_Inc	40.12
Ribes_virus_1	Brassica_virus_2_Ole	40.12
Ribes_virus_1	Brassica_virus_2_Jun	39.77
Ribes_virus_1	Primula_virus_1	39.55
Ribes_virus_1	Asclepias_syriaca_virus_3	40.57
Ribes_virus_1	Picea_virus_1	33.33
Ribes_virus_1	Pinus_yunnanensis_virus_1	33.62
Ribes_virus_1	Pinus_flexilis_virus_1	33.84
Ribes_virus_1	Pinus_banksiana_virus_1	33.48
Ribes_virus_1	Abies_virus_1	34.52
Ribes_virus_1	Cupressus_virus_1	33.19
Ribes_virus_1	Sciadopitys_virus_1_Chi	33.28
Ribes_virus_1	Sciadopitys_virus_1_Can	32.99
Ribes_virus_1	Taxus_virus_1	32.63
Ribes_virus_1	Amentotaxus_virus_1	34.15
Arceuthobium_virus_8	Ranunculus_virus_1	45.53
Arceuthobium_virus_8	Vincetoxicum_virus_1	44.18
Arceuthobium_virus_8	Aconitum_virus_1	44.10
Arceuthobium_virus_8	Zostera_associated_varicosavirus_1	44.16
Arceuthobium_virus_8	Vitis_varicosavirus	43.88
Arceuthobium_virus_8	Lupinus_virus_1	42.07
Arceuthobium_virus_8	Apera_virus_1	43.54
Arceuthobium_virus_8	Guizotia_virus_1	44.83
Arceuthobium_virus_8	Melampyrum_roseum_virus_1	44.48
Arceuthobium_virus_8	morning_glory_varicosavirus	43.17
Arceuthobium_virus_8	Allium_angulosum_virus_1	42.17
Arceuthobium_virus_8	Lolium_virus_1_Aru	39.73
Arceuthobium_virus_8	Lolium_virus_1_Per	39.18
Arceuthobium_virus_8	Alopecurus_myosuroides_varicosavirus_1	38.97
Arceuthobium_virus_8	Holcus_virus_1	40.06
Arceuthobium_virus_8	Pennisetum_virus_1	39.31
Arceuthobium_virus_8	Zea_virus_1	38.79
Arceuthobium_virus_8	Luffa_virus_1	41.20
Arceuthobium_virus_8	Cucumis_virus_1	40.98
Arceuthobium_virus_8	Streptoglossa_virus_1	40.81
Arceuthobium_virus_8	Frullania_virus_1	42.31
Arceuthobium_virus_8	Monoclea_gottschei_varicosalike_virus	42.67
Arceuthobium_virus_8	Didymochlaena_virus_1	42.12
Arceuthobium_virus_8	tree_fern_varicosalike_virus	41.78
Arceuthobium_virus_8	Treubia_virus_1	41.82
Arceuthobium_virus_8	Xinjiang_varicosavirus	38.83
Arceuthobium_virus_8	lettuce_bigvein_associated_virus	38.59
Arceuthobium_virus_8	Brassica_virus_2_Inc	40.11
Arceuthobium_virus_8	Brassica_virus_2_Ole	40.11
Arceuthobium_virus_8	Brassica_virus_2_Jun	39.87
Arceuthobium_virus_8	Primula_virus_1	39.53
Arceuthobium_virus_8	Asclepias_syriaca_virus_3	38.45
Arceuthobium_virus_8	Picea_virus_1	32.70
Arceuthobium_virus_8	Pinus_yunnanensis_virus_1	34.57
Arceuthobium_virus_8	Pinus_flexilis_virus_1	34.16
Arceuthobium_virus_8	Pinus_banksiana_virus_1	34.29
Arceuthobium_virus_8	Abies_virus_1	34.70
Arceuthobium_virus_8	Cupressus_virus_1	33.63
Arceuthobium_virus_8	Sciadopitys_virus_1_Chi	34.34
Arceuthobium_virus_8	Sciadopitys_virus_1_Can	34.76
Arceuthobium_virus_8	Taxus_virus_1	33.14
Arceuthobium_virus_8	Amentotaxus_virus_1	34.12
Ranunculus_virus_1	Vincetoxicum_virus_1	52.24
Ranunculus_virus_1	Aconitum_virus_1	48.11
Ranunculus_virus_1	Zostera_associated_varicosavirus_1	46.88
Ranunculus_virus_1	Vitis_varicosavirus	48.55
Ranunculus_virus_1	Lupinus_virus_1	47.64
Ranunculus_virus_1	Apera_virus_1	49.52
Ranunculus_virus_1	Guizotia_virus_1	49.72
Ranunculus_virus_1	Melampyrum_roseum_virus_1	50.55
Ranunculus_virus_1	morning_glory_varicosavirus	49.69
Ranunculus_virus_1	Allium_angulosum_virus_1	43.69
Ranunculus_virus_1	Lolium_virus_1_Aru	39.91
Ranunculus_virus_1	Lolium_virus_1_Per	40.29
Ranunculus_virus_1	Alopecurus_myosuroides_varicosavirus_1	39.72
Ranunculus_virus_1	Holcus_virus_1	40.70
Ranunculus_virus_1	Pennisetum_virus_1	39.11
Ranunculus_virus_1	Zea_virus_1	40.43
Ranunculus_virus_1	Luffa_virus_1	42.10
Ranunculus_virus_1	Cucumis_virus_1	41.32
Ranunculus_virus_1	Streptoglossa_virus_1	40.64
Ranunculus_virus_1	Frullania_virus_1	41.55
Ranunculus_virus_1	Monoclea_gottschei_varicosalike_virus	41.25
Ranunculus_virus_1	Didymochlaena_virus_1	42.43
Ranunculus_virus_1	tree_fern_varicosalike_virus	42.54
Ranunculus_virus_1	Treubia_virus_1	43.10
Ranunculus_virus_1	Xinjiang_varicosavirus	38.43
Ranunculus_virus_1	lettuce_bigvein_associated_virus	37.88
Ranunculus_virus_1	Brassica_virus_2_Inc	41.44
Ranunculus_virus_1	Brassica_virus_2_Ole	41.28
Ranunculus_virus_1	Brassica_virus_2_Jun	40.92
Ranunculus_virus_1	Primula_virus_1	40.61
Ranunculus_virus_1	Asclepias_syriaca_virus_3	42.14
Ranunculus_virus_1	Picea_virus_1	32.64
Ranunculus_virus_1	Pinus_yunnanensis_virus_1	32.66
Ranunculus_virus_1	Pinus_flexilis_virus_1	33.78
Ranunculus_virus_1	Pinus_banksiana_virus_1	33.48
Ranunculus_virus_1	Abies_virus_1	33.60
Ranunculus_virus_1	Cupressus_virus_1	33.41
Ranunculus_virus_1	Sciadopitys_virus_1_Chi	33.31
Ranunculus_virus_1	Sciadopitys_virus_1_Can	33.63
Ranunculus_virus_1	Taxus_virus_1	33.45
Ranunculus_virus_1	Amentotaxus_virus_1	33.31
Vincetoxicum_virus_1	Aconitum_virus_1	48.91
Vincetoxicum_virus_1	Zostera_associated_varicosavirus_1	48.13
Vincetoxicum_virus_1	Vitis_varicosavirus	48.62
Vincetoxicum_virus_1	Lupinus_virus_1	48.02
Vincetoxicum_virus_1	Apera_virus_1	48.11
Vincetoxicum_virus_1	Guizotia_virus_1	48.24
Vincetoxicum_virus_1	Melampyrum_roseum_virus_1	49.31
Vincetoxicum_virus_1	morning_glory_varicosavirus	48.69
Vincetoxicum_virus_1	Allium_angulosum_virus_1	41.79
Vincetoxicum_virus_1	Lolium_virus_1_Aru	38.67
Vincetoxicum_virus_1	Lolium_virus_1_Per	38.72
Vincetoxicum_virus_1	Alopecurus_myosuroides_varicosavirus_1	39.55
Vincetoxicum_virus_1	Holcus_virus_1	38.46
Vincetoxicum_virus_1	Pennisetum_virus_1	39.60
Vincetoxicum_virus_1	Zea_virus_1	40.52
Vincetoxicum_virus_1	Luffa_virus_1	40.92
Vincetoxicum_virus_1	Cucumis_virus_1	41.10
Vincetoxicum_virus_1	Streptoglossa_virus_1	42.06
Vincetoxicum_virus_1	Frullania_virus_1	40.68
Vincetoxicum_virus_1	Monoclea_gottschei_varicosalike_virus	42.55
Vincetoxicum_virus_1	Didymochlaena_virus_1	41.66
Vincetoxicum_virus_1	tree_fern_varicosalike_virus	42.21
Vincetoxicum_virus_1	Treubia_virus_1	42.27
Vincetoxicum_virus_1	Xinjiang_varicosavirus	39.75
Vincetoxicum_virus_1	lettuce_bigvein_associated_virus	40.61
Vincetoxicum_virus_1	Brassica_virus_2_Inc	41.04
Vincetoxicum_virus_1	Brassica_virus_2_Ole	41.13
Vincetoxicum_virus_1	Brassica_virus_2_Jun	41.03
Vincetoxicum_virus_1	Primula_virus_1	39.35
Vincetoxicum_virus_1	Asclepias_syriaca_virus_3	39.90
Vincetoxicum_virus_1	Picea_virus_1	34.01
Vincetoxicum_virus_1	Pinus_yunnanensis_virus_1	34.26
Vincetoxicum_virus_1	Pinus_flexilis_virus_1	33.51
Vincetoxicum_virus_1	Pinus_banksiana_virus_1	33.77
Vincetoxicum_virus_1	Abies_virus_1	35.03
Vincetoxicum_virus_1	Cupressus_virus_1	34.25
Vincetoxicum_virus_1	Sciadopitys_virus_1_Chi	34.62
Vincetoxicum_virus_1	Sciadopitys_virus_1_Can	34.92
Vincetoxicum_virus_1	Taxus_virus_1	33.38
Vincetoxicum_virus_1	Amentotaxus_virus_1	33.40
Aconitum_virus_1	Zostera_associated_varicosavirus_1	61.16
Aconitum_virus_1	Vitis_varicosavirus	59.57
Aconitum_virus_1	Lupinus_virus_1	58.40
Aconitum_virus_1	Apera_virus_1	49.06
Aconitum_virus_1	Guizotia_virus_1	50.87
Aconitum_virus_1	Melampyrum_roseum_virus_1	51.76
Aconitum_virus_1	morning_glory_varicosavirus	49.89
Aconitum_virus_1	Allium_angulosum_virus_1	41.03
Aconitum_virus_1	Lolium_virus_1_Aru	38.23
Aconitum_virus_1	Lolium_virus_1_Per	39.03
Aconitum_virus_1	Alopecurus_myosuroides_varicosavirus_1	39.47
Aconitum_virus_1	Holcus_virus_1	40.13
Aconitum_virus_1	Pennisetum_virus_1	39.79
Aconitum_virus_1	Zea_virus_1	40.62
Aconitum_virus_1	Luffa_virus_1	41.48
Aconitum_virus_1	Cucumis_virus_1	41.76
Aconitum_virus_1	Streptoglossa_virus_1	41.19
Aconitum_virus_1	Frullania_virus_1	40.28
Aconitum_virus_1	Monoclea_gottschei_varicosalike_virus	41.31
Aconitum_virus_1	Didymochlaena_virus_1	43.42
Aconitum_virus_1	tree_fern_varicosalike_virus	44.05
Aconitum_virus_1	Treubia_virus_1	40.91
Aconitum_virus_1	Xinjiang_varicosavirus	39.30
Aconitum_virus_1	lettuce_bigvein_associated_virus	39.86
Aconitum_virus_1	Brassica_virus_2_Inc	39.95
Aconitum_virus_1	Brassica_virus_2_Ole	39.95
Aconitum_virus_1	Brassica_virus_2_Jun	39.65
Aconitum_virus_1	Primula_virus_1	40.24
Aconitum_virus_1	Asclepias_syriaca_virus_3	39.95
Aconitum_virus_1	Picea_virus_1	32.92
Aconitum_virus_1	Pinus_yunnanensis_virus_1	33.67
Aconitum_virus_1	Pinus_flexilis_virus_1	34.54
Aconitum_virus_1	Pinus_banksiana_virus_1	34.21
Aconitum_virus_1	Abies_virus_1	33.98
Aconitum_virus_1	Cupressus_virus_1	34.41
Aconitum_virus_1	Sciadopitys_virus_1_Chi	34.47
Aconitum_virus_1	Sciadopitys_virus_1_Can	34.73
Aconitum_virus_1	Taxus_virus_1	32.85
Aconitum_virus_1	Amentotaxus_virus_1	34.02
Zostera_associated_varicosavirus_1	Vitis_varicosavirus	57.69
Zostera_associated_varicosavirus_1	Lupinus_virus_1	57.33
Zostera_associated_varicosavirus_1	Apera_virus_1	47.79
Zostera_associated_varicosavirus_1	Guizotia_virus_1	51.20
Zostera_associated_varicosavirus_1	Melampyrum_roseum_virus_1	52.52
Zostera_associated_varicosavirus_1	morning_glory_varicosavirus	50.95
Zostera_associated_varicosavirus_1	Allium_angulosum_virus_1	40.30
Zostera_associated_varicosavirus_1	Lolium_virus_1_Aru	39.59
Zostera_associated_varicosavirus_1	Lolium_virus_1_Per	39.24
Zostera_associated_varicosavirus_1	Alopecurus_myosuroides_varicosavirus_1	38.76
Zostera_associated_varicosavirus_1	Holcus_virus_1	39.56
Zostera_associated_varicosavirus_1	Pennisetum_virus_1	42.31
Zostera_associated_varicosavirus_1	Zea_virus_1	39.31
Zostera_associated_varicosavirus_1	Luffa_virus_1	42.70
Zostera_associated_varicosavirus_1	Cucumis_virus_1	41.24
Zostera_associated_varicosavirus_1	Streptoglossa_virus_1	41.87
Zostera_associated_varicosavirus_1	Frullania_virus_1	41.56
Zostera_associated_varicosavirus_1	Monoclea_gottschei_varicosalike_virus	40.57
Zostera_associated_varicosavirus_1	Didymochlaena_virus_1	41.63
Zostera_associated_varicosavirus_1	tree_fern_varicosalike_virus	42.02
Zostera_associated_varicosavirus_1	Treubia_virus_1	40.87
Zostera_associated_varicosavirus_1	Xinjiang_varicosavirus	40.09
Zostera_associated_varicosavirus_1	lettuce_bigvein_associated_virus	39.06
Zostera_associated_varicosavirus_1	Brassica_virus_2_Inc	41.18
Zostera_associated_varicosavirus_1	Brassica_virus_2_Ole	41.29
Zostera_associated_varicosavirus_1	Brassica_virus_2_Jun	41.13
Zostera_associated_varicosavirus_1	Primula_virus_1	40.25
Zostera_associated_varicosavirus_1	Asclepias_syriaca_virus_3	40.36
Zostera_associated_varicosavirus_1	Picea_virus_1	33.01
Zostera_associated_varicosavirus_1	Pinus_yunnanensis_virus_1	32.90
Zostera_associated_varicosavirus_1	Pinus_flexilis_virus_1	33.72
Zostera_associated_varicosavirus_1	Pinus_banksiana_virus_1	33.07
Zostera_associated_varicosavirus_1	Abies_virus_1	32.82
Zostera_associated_varicosavirus_1	Cupressus_virus_1	33.13
Zostera_associated_varicosavirus_1	Sciadopitys_virus_1_Chi	34.52
Zostera_associated_varicosavirus_1	Sciadopitys_virus_1_Can	34.95
Zostera_associated_varicosavirus_1	Taxus_virus_1	32.26
Zostera_associated_varicosavirus_1	Amentotaxus_virus_1	33.65
Vitis_varicosavirus	Lupinus_virus_1	56.73
Vitis_varicosavirus	Apera_virus_1	49.82
Vitis_varicosavirus	Guizotia_virus_1	50.05
Vitis_varicosavirus	Melampyrum_roseum_virus_1	51.55
Vitis_varicosavirus	morning_glory_varicosavirus	49.69
Vitis_varicosavirus	Allium_angulosum_virus_1	40.73
Vitis_varicosavirus	Lolium_virus_1_Aru	38.29
Vitis_varicosavirus	Lolium_virus_1_Per	37.76
Vitis_varicosavirus	Alopecurus_myosuroides_varicosavirus_1	39.60
Vitis_varicosavirus	Holcus_virus_1	39.97
Vitis_varicosavirus	Pennisetum_virus_1	39.52
Vitis_varicosavirus	Zea_virus_1	40.25
Vitis_varicosavirus	Luffa_virus_1	41.44
Vitis_varicosavirus	Cucumis_virus_1	42.01
Vitis_varicosavirus	Streptoglossa_virus_1	41.29
Vitis_varicosavirus	Frullania_virus_1	40.50
Vitis_varicosavirus	Monoclea_gottschei_varicosalike_virus	40.92
Vitis_varicosavirus	Didymochlaena_virus_1	42.28
Vitis_varicosavirus	tree_fern_varicosalike_virus	42.67
Vitis_varicosavirus	Treubia_virus_1	41.08
Vitis_varicosavirus	Xinjiang_varicosavirus	39.13
Vitis_varicosavirus	lettuce_bigvein_associated_virus	39.65
Vitis_varicosavirus	Brassica_virus_2_Inc	39.17
Vitis_varicosavirus	Brassica_virus_2_Ole	39.17
Vitis_varicosavirus	Brassica_virus_2_Jun	39.18
Vitis_varicosavirus	Primula_virus_1	40.15
Vitis_varicosavirus	Asclepias_syriaca_virus_3	39.31
Vitis_varicosavirus	Picea_virus_1	31.81
Vitis_varicosavirus	Pinus_yunnanensis_virus_1	32.66
Vitis_varicosavirus	Pinus_flexilis_virus_1	33.16
Vitis_varicosavirus	Pinus_banksiana_virus_1	33.23
Vitis_varicosavirus	Abies_virus_1	33.63
Vitis_varicosavirus	Cupressus_virus_1	33.02
Vitis_varicosavirus	Sciadopitys_virus_1_Chi	33.02
Vitis_varicosavirus	Sciadopitys_virus_1_Can	33.78
Vitis_varicosavirus	Taxus_virus_1	31.97
Vitis_varicosavirus	Amentotaxus_virus_1	32.56
Lupinus_virus_1	Apera_virus_1	48.85
Lupinus_virus_1	Guizotia_virus_1	50.65
Lupinus_virus_1	Melampyrum_roseum_virus_1	50.57
Lupinus_virus_1	morning_glory_varicosavirus	49.61
Lupinus_virus_1	Allium_angulosum_virus_1	41.25
Lupinus_virus_1	Lolium_virus_1_Aru	38.75
Lupinus_virus_1	Lolium_virus_1_Per	38.12
Lupinus_virus_1	Alopecurus_myosuroides_varicosavirus_1	39.08
Lupinus_virus_1	Holcus_virus_1	40.06
Lupinus_virus_1	Pennisetum_virus_1	39.67
Lupinus_virus_1	Zea_virus_1	40.63
Lupinus_virus_1	Luffa_virus_1	42.33
Lupinus_virus_1	Cucumis_virus_1	41.73
Lupinus_virus_1	Streptoglossa_virus_1	42.25
Lupinus_virus_1	Frullania_virus_1	41.19
Lupinus_virus_1	Monoclea_gottschei_varicosalike_virus	40.27
Lupinus_virus_1	Didymochlaena_virus_1	41.45
Lupinus_virus_1	tree_fern_varicosalike_virus	43.34
Lupinus_virus_1	Treubia_virus_1	41.70
Lupinus_virus_1	Xinjiang_varicosavirus	40.15
Lupinus_virus_1	lettuce_bigvein_associated_virus	40.05
Lupinus_virus_1	Brassica_virus_2_Inc	40.29
Lupinus_virus_1	Brassica_virus_2_Ole	40.24
Lupinus_virus_1	Brassica_virus_2_Jun	40.36
Lupinus_virus_1	Primula_virus_1	39.32
Lupinus_virus_1	Asclepias_syriaca_virus_3	39.25
Lupinus_virus_1	Picea_virus_1	31.87
Lupinus_virus_1	Pinus_yunnanensis_virus_1	33.02
Lupinus_virus_1	Pinus_flexilis_virus_1	33.26
Lupinus_virus_1	Pinus_banksiana_virus_1	33.16
Lupinus_virus_1	Abies_virus_1	33.14
Lupinus_virus_1	Cupressus_virus_1	32.94
Lupinus_virus_1	Sciadopitys_virus_1_Chi	33.55
Lupinus_virus_1	Sciadopitys_virus_1_Can	33.79
Lupinus_virus_1	Taxus_virus_1	32.46
Lupinus_virus_1	Amentotaxus_virus_1	34.10
Apera_virus_1	Guizotia_virus_1	51.88
Apera_virus_1	Melampyrum_roseum_virus_1	52.47
Apera_virus_1	morning_glory_varicosavirus	51.32
Apera_virus_1	Allium_angulosum_virus_1	41.22
Apera_virus_1	Lolium_virus_1_Aru	39.79
Apera_virus_1	Lolium_virus_1_Per	39.30
Apera_virus_1	Alopecurus_myosuroides_varicosavirus_1	38.62
Apera_virus_1	Holcus_virus_1	40.33
Apera_virus_1	Pennisetum_virus_1	38.86
Apera_virus_1	Zea_virus_1	39.29
Apera_virus_1	Luffa_virus_1	41.09
Apera_virus_1	Cucumis_virus_1	40.91
Apera_virus_1	Streptoglossa_virus_1	41.80
Apera_virus_1	Frullania_virus_1	41.19
Apera_virus_1	Monoclea_gottschei_varicosalike_virus	40.52
Apera_virus_1	Didymochlaena_virus_1	41.56
Apera_virus_1	tree_fern_varicosalike_virus	42.61
Apera_virus_1	Treubia_virus_1	41.90
Apera_virus_1	Xinjiang_varicosavirus	38.97
Apera_virus_1	lettuce_bigvein_associated_virus	39.47
Apera_virus_1	Brassica_virus_2_Inc	41.01
Apera_virus_1	Brassica_virus_2_Ole	41.01
Apera_virus_1	Brassica_virus_2_Jun	40.66
Apera_virus_1	Primula_virus_1	40.40
Apera_virus_1	Asclepias_syriaca_virus_3	40.32
Apera_virus_1	Picea_virus_1	33.50
Apera_virus_1	Pinus_yunnanensis_virus_1	33.72
Apera_virus_1	Pinus_flexilis_virus_1	33.07
Apera_virus_1	Pinus_banksiana_virus_1	32.31
Apera_virus_1	Abies_virus_1	34.65
Apera_virus_1	Cupressus_virus_1	32.79
Apera_virus_1	Sciadopitys_virus_1_Chi	33.96
Apera_virus_1	Sciadopitys_virus_1_Can	33.62
Apera_virus_1	Taxus_virus_1	32.93
Apera_virus_1	Amentotaxus_virus_1	33.85
Guizotia_virus_1	Melampyrum_roseum_virus_1	60.08
Guizotia_virus_1	morning_glory_varicosavirus	49.54
Guizotia_virus_1	Allium_angulosum_virus_1	42.14
Guizotia_virus_1	Lolium_virus_1_Aru	40.27
Guizotia_virus_1	Lolium_virus_1_Per	39.52
Guizotia_virus_1	Alopecurus_myosuroides_varicosavirus_1	38.89
Guizotia_virus_1	Holcus_virus_1	39.53
Guizotia_virus_1	Pennisetum_virus_1	39.97
Guizotia_virus_1	Zea_virus_1	39.75
Guizotia_virus_1	Luffa_virus_1	41.65
Guizotia_virus_1	Cucumis_virus_1	41.87
Guizotia_virus_1	Streptoglossa_virus_1	42.40
Guizotia_virus_1	Frullania_virus_1	41.49
Guizotia_virus_1	Monoclea_gottschei_varicosalike_virus	41.86
Guizotia_virus_1	Didymochlaena_virus_1	42.71
Guizotia_virus_1	tree_fern_varicosalike_virus	43.39
Guizotia_virus_1	Treubia_virus_1	41.84
Guizotia_virus_1	Xinjiang_varicosavirus	38.83
Guizotia_virus_1	lettuce_bigvein_associated_virus	41.14
Guizotia_virus_1	Brassica_virus_2_Inc	40.58
Guizotia_virus_1	Brassica_virus_2_Ole	40.63
Guizotia_virus_1	Brassica_virus_2_Jun	40.54
Guizotia_virus_1	Primula_virus_1	40.02
Guizotia_virus_1	Asclepias_syriaca_virus_3	40.58
Guizotia_virus_1	Picea_virus_1	32.52
Guizotia_virus_1	Pinus_yunnanensis_virus_1	32.13
Guizotia_virus_1	Pinus_flexilis_virus_1	33.41
Guizotia_virus_1	Pinus_banksiana_virus_1	33.46
Guizotia_virus_1	Abies_virus_1	32.62
Guizotia_virus_1	Cupressus_virus_1	34.02
Guizotia_virus_1	Sciadopitys_virus_1_Chi	34.41
Guizotia_virus_1	Sciadopitys_virus_1_Can	35.08
Guizotia_virus_1	Taxus_virus_1	33.50
Guizotia_virus_1	Amentotaxus_virus_1	33.79
Melampyrum_roseum_virus_1	morning_glory_varicosavirus	51.19
Melampyrum_roseum_virus_1	Allium_angulosum_virus_1	41.22
Melampyrum_roseum_virus_1	Lolium_virus_1_Aru	39.14
Melampyrum_roseum_virus_1	Lolium_virus_1_Per	39.81
Melampyrum_roseum_virus_1	Alopecurus_myosuroides_varicosavirus_1	40.45
Melampyrum_roseum_virus_1	Holcus_virus_1	39.75
Melampyrum_roseum_virus_1	Pennisetum_virus_1	40.70
Melampyrum_roseum_virus_1	Zea_virus_1	39.49
Melampyrum_roseum_virus_1	Luffa_virus_1	41.58
Melampyrum_roseum_virus_1	Cucumis_virus_1	41.57
Melampyrum_roseum_virus_1	Streptoglossa_virus_1	42.23
Melampyrum_roseum_virus_1	Frullania_virus_1	40.33
Melampyrum_roseum_virus_1	Monoclea_gottschei_varicosalike_virus	41.32
Melampyrum_roseum_virus_1	Didymochlaena_virus_1	42.69
Melampyrum_roseum_virus_1	tree_fern_varicosalike_virus	42.41
Melampyrum_roseum_virus_1	Treubia_virus_1	41.10
Melampyrum_roseum_virus_1	Xinjiang_varicosavirus	40.18
Melampyrum_roseum_virus_1	lettuce_bigvein_associated_virus	39.44
Melampyrum_roseum_virus_1	Brassica_virus_2_Inc	40.09
Melampyrum_roseum_virus_1	Brassica_virus_2_Ole	40.07
Melampyrum_roseum_virus_1	Brassica_virus_2_Jun	40.34
Melampyrum_roseum_virus_1	Primula_virus_1	40.88
Melampyrum_roseum_virus_1	Asclepias_syriaca_virus_3	40.09
Melampyrum_roseum_virus_1	Picea_virus_1	32.94
Melampyrum_roseum_virus_1	Pinus_yunnanensis_virus_1	32.68
Melampyrum_roseum_virus_1	Pinus_flexilis_virus_1	33.04
Melampyrum_roseum_virus_1	Pinus_banksiana_virus_1	33.60
Melampyrum_roseum_virus_1	Abies_virus_1	33.97
Melampyrum_roseum_virus_1	Cupressus_virus_1	33.93
Melampyrum_roseum_virus_1	Sciadopitys_virus_1_Chi	34.63
Melampyrum_roseum_virus_1	Sciadopitys_virus_1_Can	34.78
Melampyrum_roseum_virus_1	Taxus_virus_1	33.13
Melampyrum_roseum_virus_1	Amentotaxus_virus_1	34.04
morning_glory_varicosavirus	Allium_angulosum_virus_1	41.83
morning_glory_varicosavirus	Lolium_virus_1_Aru	37.69
morning_glory_varicosavirus	Lolium_virus_1_Per	37.80
morning_glory_varicosavirus	Alopecurus_myosuroides_varicosavirus_1	38.44
morning_glory_varicosavirus	Holcus_virus_1	39.30
morning_glory_varicosavirus	Pennisetum_virus_1	39.84
morning_glory_varicosavirus	Zea_virus_1	39.26
morning_glory_varicosavirus	Luffa_virus_1	41.59
morning_glory_varicosavirus	Cucumis_virus_1	41.51
morning_glory_varicosavirus	Streptoglossa_virus_1	42.67
morning_glory_varicosavirus	Frullania_virus_1	41.25
morning_glory_varicosavirus	Monoclea_gottschei_varicosalike_virus	40.19
morning_glory_varicosavirus	Didymochlaena_virus_1	43.18
morning_glory_varicosavirus	tree_fern_varicosalike_virus	42.72
morning_glory_varicosavirus	Treubia_virus_1	40.65
morning_glory_varicosavirus	Xinjiang_varicosavirus	39.73
morning_glory_varicosavirus	lettuce_bigvein_associated_virus	40.93
morning_glory_varicosavirus	Brassica_virus_2_Inc	40.39
morning_glory_varicosavirus	Brassica_virus_2_Ole	40.05
morning_glory_varicosavirus	Brassica_virus_2_Jun	40.06
morning_glory_varicosavirus	Primula_virus_1	39.51
morning_glory_varicosavirus	Asclepias_syriaca_virus_3	40.36
morning_glory_varicosavirus	Picea_virus_1	32.19
morning_glory_varicosavirus	Pinus_yunnanensis_virus_1	34.39
morning_glory_varicosavirus	Pinus_flexilis_virus_1	34.23
morning_glory_varicosavirus	Pinus_banksiana_virus_1	34.34
morning_glory_varicosavirus	Abies_virus_1	34.69
morning_glory_varicosavirus	Cupressus_virus_1	32.93
morning_glory_varicosavirus	Sciadopitys_virus_1_Chi	33.11
morning_glory_varicosavirus	Sciadopitys_virus_1_Can	33.48
morning_glory_varicosavirus	Taxus_virus_1	32.98
morning_glory_varicosavirus	Amentotaxus_virus_1	33.52
Allium_angulosum_virus_1	Lolium_virus_1_Aru	39.26
Allium_angulosum_virus_1	Lolium_virus_1_Per	40.22
Allium_angulosum_virus_1	Alopecurus_myosuroides_varicosavirus_1	39.63
Allium_angulosum_virus_1	Holcus_virus_1	39.07
Allium_angulosum_virus_1	Pennisetum_virus_1	40.89
Allium_angulosum_virus_1	Zea_virus_1	38.74
Allium_angulosum_virus_1	Luffa_virus_1	41.45
Allium_angulosum_virus_1	Cucumis_virus_1	40.54
Allium_angulosum_virus_1	Streptoglossa_virus_1	40.62
Allium_angulosum_virus_1	Frullania_virus_1	42.20
Allium_angulosum_virus_1	Monoclea_gottschei_varicosalike_virus	42.20
Allium_angulosum_virus_1	Didymochlaena_virus_1	43.07
Allium_angulosum_virus_1	tree_fern_varicosalike_virus	43.04
Allium_angulosum_virus_1	Treubia_virus_1	43.13
Allium_angulosum_virus_1	Xinjiang_varicosavirus	39.76
Allium_angulosum_virus_1	lettuce_bigvein_associated_virus	38.20
Allium_angulosum_virus_1	Brassica_virus_2_Inc	39.84
Allium_angulosum_virus_1	Brassica_virus_2_Ole	39.79
Allium_angulosum_virus_1	Brassica_virus_2_Jun	40.01
Allium_angulosum_virus_1	Primula_virus_1	40.72
Allium_angulosum_virus_1	Asclepias_syriaca_virus_3	40.07
Allium_angulosum_virus_1	Picea_virus_1	33.38
Allium_angulosum_virus_1	Pinus_yunnanensis_virus_1	34.52
Allium_angulosum_virus_1	Pinus_flexilis_virus_1	34.25
Allium_angulosum_virus_1	Pinus_banksiana_virus_1	33.97
Allium_angulosum_virus_1	Abies_virus_1	33.23
Allium_angulosum_virus_1	Cupressus_virus_1	34.08
Allium_angulosum_virus_1	Sciadopitys_virus_1_Chi	32.50
Allium_angulosum_virus_1	Sciadopitys_virus_1_Can	32.63
Allium_angulosum_virus_1	Taxus_virus_1	33.64
Allium_angulosum_virus_1	Amentotaxus_virus_1	34.13
Lolium_virus_1_Aru	Lolium_virus_1_Per	89.69
Lolium_virus_1_Aru	Alopecurus_myosuroides_varicosavirus_1	71.18
Lolium_virus_1_Aru	Holcus_virus_1	64.33
Lolium_virus_1_Aru	Pennisetum_virus_1	50.99
Lolium_virus_1_Aru	Zea_virus_1	49.35
Lolium_virus_1_Aru	Luffa_virus_1	49.13
Lolium_virus_1_Aru	Cucumis_virus_1	47.55
Lolium_virus_1_Aru	Streptoglossa_virus_1	49.37
Lolium_virus_1_Aru	Frullania_virus_1	41.97
Lolium_virus_1_Aru	Monoclea_gottschei_varicosalike_virus	41.70
Lolium_virus_1_Aru	Didymochlaena_virus_1	43.13
Lolium_virus_1_Aru	tree_fern_varicosalike_virus	42.85
Lolium_virus_1_Aru	Treubia_virus_1	43.22
Lolium_virus_1_Aru	Xinjiang_varicosavirus	37.79
Lolium_virus_1_Aru	lettuce_bigvein_associated_virus	38.42
Lolium_virus_1_Aru	Brassica_virus_2_Inc	39.79
Lolium_virus_1_Aru	Brassica_virus_2_Ole	39.86
Lolium_virus_1_Aru	Brassica_virus_2_Jun	39.64
Lolium_virus_1_Aru	Primula_virus_1	40.52
Lolium_virus_1_Aru	Asclepias_syriaca_virus_3	40.55
Lolium_virus_1_Aru	Picea_virus_1	32.70
Lolium_virus_1_Aru	Pinus_yunnanensis_virus_1	33.28
Lolium_virus_1_Aru	Pinus_flexilis_virus_1	34.31
Lolium_virus_1_Aru	Pinus_banksiana_virus_1	33.95
Lolium_virus_1_Aru	Abies_virus_1	35.44
Lolium_virus_1_Aru	Cupressus_virus_1	34.10
Lolium_virus_1_Aru	Sciadopitys_virus_1_Chi	34.49
Lolium_virus_1_Aru	Sciadopitys_virus_1_Can	34.62
Lolium_virus_1_Aru	Taxus_virus_1	34.27
Lolium_virus_1_Aru	Amentotaxus_virus_1	36.17
Lolium_virus_1_Per	Alopecurus_myosuroides_varicosavirus_1	71.68
Lolium_virus_1_Per	Holcus_virus_1	64.62
Lolium_virus_1_Per	Pennisetum_virus_1	51.13
Lolium_virus_1_Per	Zea_virus_1	49.18
Lolium_virus_1_Per	Luffa_virus_1	49.23
Lolium_virus_1_Per	Cucumis_virus_1	47.37
Lolium_virus_1_Per	Streptoglossa_virus_1	49.90
Lolium_virus_1_Per	Frullania_virus_1	42.04
Lolium_virus_1_Per	Monoclea_gottschei_varicosalike_virus	41.69
Lolium_virus_1_Per	Didymochlaena_virus_1	43.06
Lolium_virus_1_Per	tree_fern_varicosalike_virus	43.15
Lolium_virus_1_Per	Treubia_virus_1	42.98
Lolium_virus_1_Per	Xinjiang_varicosavirus	37.18
Lolium_virus_1_Per	lettuce_bigvein_associated_virus	38.24
Lolium_virus_1_Per	Brassica_virus_2_Inc	39.09
Lolium_virus_1_Per	Brassica_virus_2_Ole	39.11
Lolium_virus_1_Per	Brassica_virus_2_Jun	38.97
Lolium_virus_1_Per	Primula_virus_1	40.23
Lolium_virus_1_Per	Asclepias_syriaca_virus_3	40.81
Lolium_virus_1_Per	Picea_virus_1	32.22
Lolium_virus_1_Per	Pinus_yunnanensis_virus_1	33.71
Lolium_virus_1_Per	Pinus_flexilis_virus_1	34.02
Lolium_virus_1_Per	Pinus_banksiana_virus_1	33.41
Lolium_virus_1_Per	Abies_virus_1	35.66
Lolium_virus_1_Per	Cupressus_virus_1	33.95
Lolium_virus_1_Per	Sciadopitys_virus_1_Chi	34.32
Lolium_virus_1_Per	Sciadopitys_virus_1_Can	34.64
Lolium_virus_1_Per	Taxus_virus_1	33.93
Lolium_virus_1_Per	Amentotaxus_virus_1	35.48
Alopecurus_myosuroides_varicosavirus_1	Holcus_virus_1	64.76
Alopecurus_myosuroides_varicosavirus_1	Pennisetum_virus_1	50.46
Alopecurus_myosuroides_varicosavirus_1	Zea_virus_1	49.08
Alopecurus_myosuroides_varicosavirus_1	Luffa_virus_1	48.44
Alopecurus_myosuroides_varicosavirus_1	Cucumis_virus_1	47.62
Alopecurus_myosuroides_varicosavirus_1	Streptoglossa_virus_1	49.20
Alopecurus_myosuroides_varicosavirus_1	Frullania_virus_1	41.33
Alopecurus_myosuroides_varicosavirus_1	Monoclea_gottschei_varicosalike_virus	40.93
Alopecurus_myosuroides_varicosavirus_1	Didymochlaena_virus_1	42.96
Alopecurus_myosuroides_varicosavirus_1	tree_fern_varicosalike_virus	43.46
Alopecurus_myosuroides_varicosavirus_1	Treubia_virus_1	43.88
Alopecurus_myosuroides_varicosavirus_1	Xinjiang_varicosavirus	38.63
Alopecurus_myosuroides_varicosavirus_1	lettuce_bigvein_associated_virus	38.10
Alopecurus_myosuroides_varicosavirus_1	Brassica_virus_2_Inc	38.99
Alopecurus_myosuroides_varicosavirus_1	Brassica_virus_2_Ole	38.86
Alopecurus_myosuroides_varicosavirus_1	Brassica_virus_2_Jun	38.84
Alopecurus_myosuroides_varicosavirus_1	Primula_virus_1	39.42
Alopecurus_myosuroides_varicosavirus_1	Asclepias_syriaca_virus_3	40.47
Alopecurus_myosuroides_varicosavirus_1	Picea_virus_1	33.92
Alopecurus_myosuroides_varicosavirus_1	Pinus_yunnanensis_virus_1	34.15
Alopecurus_myosuroides_varicosavirus_1	Pinus_flexilis_virus_1	34.59
Alopecurus_myosuroides_varicosavirus_1	Pinus_banksiana_virus_1	34.57
Alopecurus_myosuroides_varicosavirus_1	Abies_virus_1	35.34
Alopecurus_myosuroides_varicosavirus_1	Cupressus_virus_1	34.92
Alopecurus_myosuroides_varicosavirus_1	Sciadopitys_virus_1_Chi	35.27
Alopecurus_myosuroides_varicosavirus_1	Sciadopitys_virus_1_Can	35.39
Alopecurus_myosuroides_varicosavirus_1	Taxus_virus_1	34.54
Alopecurus_myosuroides_varicosavirus_1	Amentotaxus_virus_1	34.89
Holcus_virus_1	Pennisetum_virus_1	50.19
Holcus_virus_1	Zea_virus_1	51.40
Holcus_virus_1	Luffa_virus_1	48.09
Holcus_virus_1	Cucumis_virus_1	47.32
Holcus_virus_1	Streptoglossa_virus_1	49.87
Holcus_virus_1	Frullania_virus_1	42.15
Holcus_virus_1	Monoclea_gottschei_varicosalike_virus	41.56
Holcus_virus_1	Didymochlaena_virus_1	43.27
Holcus_virus_1	tree_fern_varicosalike_virus	42.53
Holcus_virus_1	Treubia_virus_1	42.13
Holcus_virus_1	Xinjiang_varicosavirus	37.91
Holcus_virus_1	lettuce_bigvein_associated_virus	39.65
Holcus_virus_1	Brassica_virus_2_Inc	38.29
Holcus_virus_1	Brassica_virus_2_Ole	38.34
Holcus_virus_1	Brassica_virus_2_Jun	38.49
Holcus_virus_1	Primula_virus_1	40.49
Holcus_virus_1	Asclepias_syriaca_virus_3	40.16
Holcus_virus_1	Picea_virus_1	33.75
Holcus_virus_1	Pinus_yunnanensis_virus_1	33.82
Holcus_virus_1	Pinus_flexilis_virus_1	34.46
Holcus_virus_1	Pinus_banksiana_virus_1	34.97
Holcus_virus_1	Abies_virus_1	35.41
Holcus_virus_1	Cupressus_virus_1	34.62
Holcus_virus_1	Sciadopitys_virus_1_Chi	34.37
Holcus_virus_1	Sciadopitys_virus_1_Can	34.20
Holcus_virus_1	Taxus_virus_1	34.57
Holcus_virus_1	Amentotaxus_virus_1	34.17
Pennisetum_virus_1	Zea_virus_1	49.60
Pennisetum_virus_1	Luffa_virus_1	48.34
Pennisetum_virus_1	Cucumis_virus_1	48.53
Pennisetum_virus_1	Streptoglossa_virus_1	49.55
Pennisetum_virus_1	Frullania_virus_1	41.97
Pennisetum_virus_1	Monoclea_gottschei_varicosalike_virus	42.34
Pennisetum_virus_1	Didymochlaena_virus_1	42.03
Pennisetum_virus_1	tree_fern_varicosalike_virus	42.82
Pennisetum_virus_1	Treubia_virus_1	43.05
Pennisetum_virus_1	Xinjiang_varicosavirus	38.78
Pennisetum_virus_1	lettuce_bigvein_associated_virus	39.13
Pennisetum_virus_1	Brassica_virus_2_Inc	38.17
Pennisetum_virus_1	Brassica_virus_2_Ole	38.14
Pennisetum_virus_1	Brassica_virus_2_Jun	37.74
Pennisetum_virus_1	Primula_virus_1	39.57
Pennisetum_virus_1	Asclepias_syriaca_virus_3	39.31
Pennisetum_virus_1	Picea_virus_1	31.15
Pennisetum_virus_1	Pinus_yunnanensis_virus_1	34.24
Pennisetum_virus_1	Pinus_flexilis_virus_1	33.95
Pennisetum_virus_1	Pinus_banksiana_virus_1	33.41
Pennisetum_virus_1	Abies_virus_1	34.55
Pennisetum_virus_1	Cupressus_virus_1	33.93
Pennisetum_virus_1	Sciadopitys_virus_1_Chi	35.22
Pennisetum_virus_1	Sciadopitys_virus_1_Can	35.14
Pennisetum_virus_1	Taxus_virus_1	34.91
Pennisetum_virus_1	Amentotaxus_virus_1	35.10
Zea_virus_1	Luffa_virus_1	49.25
Zea_virus_1	Cucumis_virus_1	48.26
Zea_virus_1	Streptoglossa_virus_1	48.28
Zea_virus_1	Frullania_virus_1	43.75
Zea_virus_1	Monoclea_gottschei_varicosalike_virus	40.63
Zea_virus_1	Didymochlaena_virus_1	42.58
Zea_virus_1	tree_fern_varicosalike_virus	42.99
Zea_virus_1	Treubia_virus_1	43.38
Zea_virus_1	Xinjiang_varicosavirus	38.40
Zea_virus_1	lettuce_bigvein_associated_virus	38.37
Zea_virus_1	Brassica_virus_2_Inc	39.07
Zea_virus_1	Brassica_virus_2_Ole	39.07
Zea_virus_1	Brassica_virus_2_Jun	39.06
Zea_virus_1	Primula_virus_1	39.79
Zea_virus_1	Asclepias_syriaca_virus_3	40.67
Zea_virus_1	Picea_virus_1	33.87
Zea_virus_1	Pinus_yunnanensis_virus_1	34.92
Zea_virus_1	Pinus_flexilis_virus_1	34.59
Zea_virus_1	Pinus_banksiana_virus_1	35.24
Zea_virus_1	Abies_virus_1	35.68
Zea_virus_1	Cupressus_virus_1	34.11
Zea_virus_1	Sciadopitys_virus_1_Chi	34.31
Zea_virus_1	Sciadopitys_virus_1_Can	34.02
Zea_virus_1	Taxus_virus_1	34.32
Zea_virus_1	Amentotaxus_virus_1	34.53
Luffa_virus_1	Cucumis_virus_1	62.74
Luffa_virus_1	Streptoglossa_virus_1	52.71
Luffa_virus_1	Frullania_virus_1	45.20
Luffa_virus_1	Monoclea_gottschei_varicosalike_virus	43.73
Luffa_virus_1	Didymochlaena_virus_1	44.32
Luffa_virus_1	tree_fern_varicosalike_virus	44.75
Luffa_virus_1	Treubia_virus_1	44.87
Luffa_virus_1	Xinjiang_varicosavirus	38.50
Luffa_virus_1	lettuce_bigvein_associated_virus	39.26
Luffa_virus_1	Brassica_virus_2_Inc	40.59
Luffa_virus_1	Brassica_virus_2_Ole	40.54
Luffa_virus_1	Brassica_virus_2_Jun	40.31
Luffa_virus_1	Primula_virus_1	40.73
Luffa_virus_1	Asclepias_syriaca_virus_3	41.47
Luffa_virus_1	Picea_virus_1	32.92
Luffa_virus_1	Pinus_yunnanensis_virus_1	36.11
Luffa_virus_1	Pinus_flexilis_virus_1	34.58
Luffa_virus_1	Pinus_banksiana_virus_1	34.81
Luffa_virus_1	Abies_virus_1	34.59
Luffa_virus_1	Cupressus_virus_1	34.07
Luffa_virus_1	Sciadopitys_virus_1_Chi	35.44
Luffa_virus_1	Sciadopitys_virus_1_Can	35.27
Luffa_virus_1	Taxus_virus_1	35.87
Luffa_virus_1	Amentotaxus_virus_1	35.22
Cucumis_virus_1	Streptoglossa_virus_1	51.93
Cucumis_virus_1	Frullania_virus_1	43.55
Cucumis_virus_1	Monoclea_gottschei_varicosalike_virus	43.74
Cucumis_virus_1	Didymochlaena_virus_1	44.14
Cucumis_virus_1	tree_fern_varicosalike_virus	44.66
Cucumis_virus_1	Treubia_virus_1	44.62
Cucumis_virus_1	Xinjiang_varicosavirus	39.51
Cucumis_virus_1	lettuce_bigvein_associated_virus	38.64
Cucumis_virus_1	Brassica_virus_2_Inc	40.50
Cucumis_virus_1	Brassica_virus_2_Ole	40.50
Cucumis_virus_1	Brassica_virus_2_Jun	40.30
Cucumis_virus_1	Primula_virus_1	41.51
Cucumis_virus_1	Asclepias_syriaca_virus_3	42.74
Cucumis_virus_1	Picea_virus_1	34.79
Cucumis_virus_1	Pinus_yunnanensis_virus_1	35.45
Cucumis_virus_1	Pinus_flexilis_virus_1	36.11
Cucumis_virus_1	Pinus_banksiana_virus_1	35.04
Cucumis_virus_1	Abies_virus_1	35.70
Cucumis_virus_1	Cupressus_virus_1	34.89
Cucumis_virus_1	Sciadopitys_virus_1_Chi	35.03
Cucumis_virus_1	Sciadopitys_virus_1_Can	35.20
Cucumis_virus_1	Taxus_virus_1	35.72
Cucumis_virus_1	Amentotaxus_virus_1	35.41
Streptoglossa_virus_1	Frullania_virus_1	45.23
Streptoglossa_virus_1	Monoclea_gottschei_varicosalike_virus	44.58
Streptoglossa_virus_1	Didymochlaena_virus_1	44.94
Streptoglossa_virus_1	tree_fern_varicosalike_virus	45.41
Streptoglossa_virus_1	Treubia_virus_1	45.46
Streptoglossa_virus_1	Xinjiang_varicosavirus	39.08
Streptoglossa_virus_1	lettuce_bigvein_associated_virus	39.81
Streptoglossa_virus_1	Brassica_virus_2_Inc	39.55
Streptoglossa_virus_1	Brassica_virus_2_Ole	39.60
Streptoglossa_virus_1	Brassica_virus_2_Jun	39.45
Streptoglossa_virus_1	Primula_virus_1	41.99
Streptoglossa_virus_1	Asclepias_syriaca_virus_3	41.92
Streptoglossa_virus_1	Picea_virus_1	34.18
Streptoglossa_virus_1	Pinus_yunnanensis_virus_1	36.12
Streptoglossa_virus_1	Pinus_flexilis_virus_1	36.46
Streptoglossa_virus_1	Pinus_banksiana_virus_1	35.55
Streptoglossa_virus_1	Abies_virus_1	35.35
Streptoglossa_virus_1	Cupressus_virus_1	36.42
Streptoglossa_virus_1	Sciadopitys_virus_1_Chi	36.07
Streptoglossa_virus_1	Sciadopitys_virus_1_Can	36.01
Streptoglossa_virus_1	Taxus_virus_1	36.03
Streptoglossa_virus_1	Amentotaxus_virus_1	35.33
Frullania_virus_1	Monoclea_gottschei_varicosalike_virus	54.83
Frullania_virus_1	Didymochlaena_virus_1	48.19
Frullania_virus_1	tree_fern_varicosalike_virus	48.23
Frullania_virus_1	Treubia_virus_1	48.95
Frullania_virus_1	Xinjiang_varicosavirus	43.47
Frullania_virus_1	lettuce_bigvein_associated_virus	43.89
Frullania_virus_1	Brassica_virus_2_Inc	42.70
Frullania_virus_1	Brassica_virus_2_Ole	42.65
Frullania_virus_1	Brassica_virus_2_Jun	42.50
Frullania_virus_1	Primula_virus_1	41.49
Frullania_virus_1	Asclepias_syriaca_virus_3	41.57
Frullania_virus_1	Picea_virus_1	34.25
Frullania_virus_1	Pinus_yunnanensis_virus_1	34.99
Frullania_virus_1	Pinus_flexilis_virus_1	35.98
Frullania_virus_1	Pinus_banksiana_virus_1	36.38
Frullania_virus_1	Abies_virus_1	36.41
Frullania_virus_1	Cupressus_virus_1	36.45
Frullania_virus_1	Sciadopitys_virus_1_Chi	35.66
Frullania_virus_1	Sciadopitys_virus_1_Can	35.54
Frullania_virus_1	Taxus_virus_1	35.05
Frullania_virus_1	Amentotaxus_virus_1	35.71
Monoclea_gottschei_varicosalike_virus	Didymochlaena_virus_1	46.68
Monoclea_gottschei_varicosalike_virus	tree_fern_varicosalike_virus	46.50
Monoclea_gottschei_varicosalike_virus	Treubia_virus_1	47.49
Monoclea_gottschei_varicosalike_virus	Xinjiang_varicosavirus	42.71
Monoclea_gottschei_varicosalike_virus	lettuce_bigvein_associated_virus	43.38
Monoclea_gottschei_varicosalike_virus	Brassica_virus_2_Inc	41.79
Monoclea_gottschei_varicosalike_virus	Brassica_virus_2_Ole	41.74
Monoclea_gottschei_varicosalike_virus	Brassica_virus_2_Jun	41.79
Monoclea_gottschei_varicosalike_virus	Primula_virus_1	41.23
Monoclea_gottschei_varicosalike_virus	Asclepias_syriaca_virus_3	41.75
Monoclea_gottschei_varicosalike_virus	Picea_virus_1	34.38
Monoclea_gottschei_varicosalike_virus	Pinus_yunnanensis_virus_1	35.10
Monoclea_gottschei_varicosalike_virus	Pinus_flexilis_virus_1	35.10
Monoclea_gottschei_varicosalike_virus	Pinus_banksiana_virus_1	34.86
Monoclea_gottschei_varicosalike_virus	Abies_virus_1	36.27
Monoclea_gottschei_varicosalike_virus	Cupressus_virus_1	34.73
Monoclea_gottschei_varicosalike_virus	Sciadopitys_virus_1_Chi	35.94
Monoclea_gottschei_varicosalike_virus	Sciadopitys_virus_1_Can	36.19
Monoclea_gottschei_varicosalike_virus	Taxus_virus_1	35.55
Monoclea_gottschei_varicosalike_virus	Amentotaxus_virus_1	36.49
Didymochlaena_virus_1	tree_fern_varicosalike_virus	74.16
Didymochlaena_virus_1	Treubia_virus_1	53.40
Didymochlaena_virus_1	Xinjiang_varicosavirus	41.81
Didymochlaena_virus_1	lettuce_bigvein_associated_virus	40.48
Didymochlaena_virus_1	Brassica_virus_2_Inc	41.12
Didymochlaena_virus_1	Brassica_virus_2_Ole	41.03
Didymochlaena_virus_1	Brassica_virus_2_Jun	40.72
Didymochlaena_virus_1	Primula_virus_1	42.14
Didymochlaena_virus_1	Asclepias_syriaca_virus_3	41.53
Didymochlaena_virus_1	Picea_virus_1	34.71
Didymochlaena_virus_1	Pinus_yunnanensis_virus_1	35.17
Didymochlaena_virus_1	Pinus_flexilis_virus_1	34.90
Didymochlaena_virus_1	Pinus_banksiana_virus_1	36.13
Didymochlaena_virus_1	Abies_virus_1	35.32
Didymochlaena_virus_1	Cupressus_virus_1	35.19
Didymochlaena_virus_1	Sciadopitys_virus_1_Chi	34.21
Didymochlaena_virus_1	Sciadopitys_virus_1_Can	34.35
Didymochlaena_virus_1	Taxus_virus_1	35.43
Didymochlaena_virus_1	Amentotaxus_virus_1	35.57
tree_fern_varicosalike_virus	Treubia_virus_1	53.91
tree_fern_varicosalike_virus	Xinjiang_varicosavirus	40.94
tree_fern_varicosalike_virus	lettuce_bigvein_associated_virus	41.62
tree_fern_varicosalike_virus	Brassica_virus_2_Inc	42.03
tree_fern_varicosalike_virus	Brassica_virus_2_Ole	41.98
tree_fern_varicosalike_virus	Brassica_virus_2_Jun	41.96
tree_fern_varicosalike_virus	Primula_virus_1	43.17
tree_fern_varicosalike_virus	Asclepias_syriaca_virus_3	42.59
tree_fern_varicosalike_virus	Picea_virus_1	34.26
tree_fern_varicosalike_virus	Pinus_yunnanensis_virus_1	36.64
tree_fern_varicosalike_virus	Pinus_flexilis_virus_1	35.49
tree_fern_varicosalike_virus	Pinus_banksiana_virus_1	36.52
tree_fern_varicosalike_virus	Abies_virus_1	35.84
tree_fern_varicosalike_virus	Cupressus_virus_1	34.90
tree_fern_varicosalike_virus	Sciadopitys_virus_1_Chi	35.07
tree_fern_varicosalike_virus	Sciadopitys_virus_1_Can	35.27
tree_fern_varicosalike_virus	Taxus_virus_1	34.35
tree_fern_varicosalike_virus	Amentotaxus_virus_1	36.49
Treubia_virus_1	Xinjiang_varicosavirus	40.34
Treubia_virus_1	lettuce_bigvein_associated_virus	41.80
Treubia_virus_1	Brassica_virus_2_Inc	41.38
Treubia_virus_1	Brassica_virus_2_Ole	41.33
Treubia_virus_1	Brassica_virus_2_Jun	41.33
Treubia_virus_1	Primula_virus_1	40.32
Treubia_virus_1	Asclepias_syriaca_virus_3	43.02
Treubia_virus_1	Picea_virus_1	34.10
Treubia_virus_1	Pinus_yunnanensis_virus_1	34.98
Treubia_virus_1	Pinus_flexilis_virus_1	34.25
Treubia_virus_1	Pinus_banksiana_virus_1	34.73
Treubia_virus_1	Abies_virus_1	35.01
Treubia_virus_1	Cupressus_virus_1	33.64
Treubia_virus_1	Sciadopitys_virus_1_Chi	34.75
Treubia_virus_1	Sciadopitys_virus_1_Can	34.87
Treubia_virus_1	Taxus_virus_1	34.26
Treubia_virus_1	Amentotaxus_virus_1	35.47
Xinjiang_varicosavirus	lettuce_bigvein_associated_virus	62.18
Xinjiang_varicosavirus	Brassica_virus_2_Inc	40.47
Xinjiang_varicosavirus	Brassica_virus_2_Ole	40.47
Xinjiang_varicosavirus	Brassica_virus_2_Jun	40.22
Xinjiang_varicosavirus	Primula_virus_1	39.72
Xinjiang_varicosavirus	Asclepias_syriaca_virus_3	39.53
Xinjiang_varicosavirus	Picea_virus_1	34.04
Xinjiang_varicosavirus	Pinus_yunnanensis_virus_1	33.70
Xinjiang_varicosavirus	Pinus_flexilis_virus_1	33.43
Xinjiang_varicosavirus	Pinus_banksiana_virus_1	34.93
Xinjiang_varicosavirus	Abies_virus_1	34.77
Xinjiang_varicosavirus	Cupressus_virus_1	33.86
Xinjiang_varicosavirus	Sciadopitys_virus_1_Chi	34.18
Xinjiang_varicosavirus	Sciadopitys_virus_1_Can	34.31
Xinjiang_varicosavirus	Taxus_virus_1	33.86
Xinjiang_varicosavirus	Amentotaxus_virus_1	34.51
lettuce_bigvein_associated_virus	Brassica_virus_2_Inc	38.66
lettuce_bigvein_associated_virus	Brassica_virus_2_Ole	38.96
lettuce_bigvein_associated_virus	Brassica_virus_2_Jun	38.66
lettuce_bigvein_associated_virus	Primula_virus_1	38.50
lettuce_bigvein_associated_virus	Asclepias_syriaca_virus_3	39.75
lettuce_bigvein_associated_virus	Picea_virus_1	32.81
lettuce_bigvein_associated_virus	Pinus_yunnanensis_virus_1	34.44
lettuce_bigvein_associated_virus	Pinus_flexilis_virus_1	33.88
lettuce_bigvein_associated_virus	Pinus_banksiana_virus_1	35.49
lettuce_bigvein_associated_virus	Abies_virus_1	36.21
lettuce_bigvein_associated_virus	Cupressus_virus_1	34.79
lettuce_bigvein_associated_virus	Sciadopitys_virus_1_Chi	34.95
lettuce_bigvein_associated_virus	Sciadopitys_virus_1_Can	34.96
lettuce_bigvein_associated_virus	Taxus_virus_1	34.30
lettuce_bigvein_associated_virus	Amentotaxus_virus_1	34.90
Brassica_virus_2_Inc	Brassica_virus_2_Ole	99.75
Brassica_virus_2_Inc	Brassica_virus_2_Jun	98.62
Brassica_virus_2_Inc	Primula_virus_1	53.56
Brassica_virus_2_Inc	Asclepias_syriaca_virus_3	56.04
Brassica_virus_2_Inc	Picea_virus_1	32.60
Brassica_virus_2_Inc	Pinus_yunnanensis_virus_1	34.79
Brassica_virus_2_Inc	Pinus_flexilis_virus_1	34.43
Brassica_virus_2_Inc	Pinus_banksiana_virus_1	34.27
Brassica_virus_2_Inc	Abies_virus_1	34.17
Brassica_virus_2_Inc	Cupressus_virus_1	35.09
Brassica_virus_2_Inc	Sciadopitys_virus_1_Chi	34.30
Brassica_virus_2_Inc	Sciadopitys_virus_1_Can	34.37
Brassica_virus_2_Inc	Taxus_virus_1	35.45
Brassica_virus_2_Inc	Amentotaxus_virus_1	34.02
Brassica_virus_2_Ole	Brassica_virus_2_Jun	98.57
Brassica_virus_2_Ole	Primula_virus_1	53.56
Brassica_virus_2_Ole	Asclepias_syriaca_virus_3	56.14
Brassica_virus_2_Ole	Picea_virus_1	32.64
Brassica_virus_2_Ole	Pinus_yunnanensis_virus_1	34.84
Brassica_virus_2_Ole	Pinus_flexilis_virus_1	34.38
Brassica_virus_2_Ole	Pinus_banksiana_virus_1	34.32
Brassica_virus_2_Ole	Abies_virus_1	34.22
Brassica_virus_2_Ole	Cupressus_virus_1	34.85
Brassica_virus_2_Ole	Sciadopitys_virus_1_Chi	34.35
Brassica_virus_2_Ole	Sciadopitys_virus_1_Can	34.57
Brassica_virus_2_Ole	Taxus_virus_1	35.50
Brassica_virus_2_Ole	Amentotaxus_virus_1	34.07
Brassica_virus_2_Jun	Primula_virus_1	53.75
Brassica_virus_2_Jun	Asclepias_syriaca_virus_3	55.84
Brassica_virus_2_Jun	Picea_virus_1	32.59
Brassica_virus_2_Jun	Pinus_yunnanensis_virus_1	34.18
Brassica_virus_2_Jun	Pinus_flexilis_virus_1	34.08
Brassica_virus_2_Jun	Pinus_banksiana_virus_1	34.27
Brassica_virus_2_Jun	Abies_virus_1	34.02
Brassica_virus_2_Jun	Cupressus_virus_1	35.19
Brassica_virus_2_Jun	Sciadopitys_virus_1_Chi	33.83
Brassica_virus_2_Jun	Sciadopitys_virus_1_Can	34.30
Brassica_virus_2_Jun	Taxus_virus_1	35.38
Brassica_virus_2_Jun	Amentotaxus_virus_1	33.75
Primula_virus_1	Asclepias_syriaca_virus_3	59.01
Primula_virus_1	Picea_virus_1	34.63
Primula_virus_1	Pinus_yunnanensis_virus_1	34.71
Primula_virus_1	Pinus_flexilis_virus_1	35.01
Primula_virus_1	Pinus_banksiana_virus_1	34.53
Primula_virus_1	Abies_virus_1	34.46
Primula_virus_1	Cupressus_virus_1	35.07
Primula_virus_1	Sciadopitys_virus_1_Chi	34.92
Primula_virus_1	Sciadopitys_virus_1_Can	34.02
Primula_virus_1	Taxus_virus_1	35.01
Primula_virus_1	Amentotaxus_virus_1	36.36
Asclepias_syriaca_virus_3	Picea_virus_1	33.60
Asclepias_syriaca_virus_3	Pinus_yunnanensis_virus_1	34.54
Asclepias_syriaca_virus_3	Pinus_flexilis_virus_1	34.95
Asclepias_syriaca_virus_3	Pinus_banksiana_virus_1	34.37
Asclepias_syriaca_virus_3	Abies_virus_1	34.89
Asclepias_syriaca_virus_3	Cupressus_virus_1	34.72
Asclepias_syriaca_virus_3	Sciadopitys_virus_1_Chi	34.09
Asclepias_syriaca_virus_3	Sciadopitys_virus_1_Can	34.40
Asclepias_syriaca_virus_3	Taxus_virus_1	33.90
Asclepias_syriaca_virus_3	Amentotaxus_virus_1	35.39
Picea_virus_1	Pinus_yunnanensis_virus_1	50.29
Picea_virus_1	Pinus_flexilis_virus_1	49.46
Picea_virus_1	Pinus_banksiana_virus_1	49.04
Picea_virus_1	Abies_virus_1	47.73
Picea_virus_1	Cupressus_virus_1	47.68
Picea_virus_1	Sciadopitys_virus_1_Chi	45.58
Picea_virus_1	Sciadopitys_virus_1_Can	46.02
Picea_virus_1	Taxus_virus_1	46.46
Picea_virus_1	Amentotaxus_virus_1	45.34
Pinus_yunnanensis_virus_1	Pinus_flexilis_virus_1	70.31
Pinus_yunnanensis_virus_1	Pinus_banksiana_virus_1	66.89
Pinus_yunnanensis_virus_1	Abies_virus_1	52.35
Pinus_yunnanensis_virus_1	Cupressus_virus_1	50.02
Pinus_yunnanensis_virus_1	Sciadopitys_virus_1_Chi	46.77
Pinus_yunnanensis_virus_1	Sciadopitys_virus_1_Can	46.50
Pinus_yunnanensis_virus_1	Taxus_virus_1	47.36
Pinus_yunnanensis_virus_1	Amentotaxus_virus_1	46.88
Pinus_flexilis_virus_1	Pinus_banksiana_virus_1	65.41
Pinus_flexilis_virus_1	Abies_virus_1	52.91
Pinus_flexilis_virus_1	Cupressus_virus_1	49.36
Pinus_flexilis_virus_1	Sciadopitys_virus_1_Chi	46.49
Pinus_flexilis_virus_1	Sciadopitys_virus_1_Can	46.81
Pinus_flexilis_virus_1	Taxus_virus_1	47.28
Pinus_flexilis_virus_1	Amentotaxus_virus_1	46.56
Pinus_banksiana_virus_1	Abies_virus_1	52.46
Pinus_banksiana_virus_1	Cupressus_virus_1	48.60
Pinus_banksiana_virus_1	Sciadopitys_virus_1_Chi	46.58
Pinus_banksiana_virus_1	Sciadopitys_virus_1_Can	46.63
Pinus_banksiana_virus_1	Taxus_virus_1	46.69
Pinus_banksiana_virus_1	Amentotaxus_virus_1	45.65
Abies_virus_1	Cupressus_virus_1	49.87
Abies_virus_1	Sciadopitys_virus_1_Chi	45.55
Abies_virus_1	Sciadopitys_virus_1_Can	45.80
Abies_virus_1	Taxus_virus_1	46.48
Abies_virus_1	Amentotaxus_virus_1	45.93
Cupressus_virus_1	Sciadopitys_virus_1_Chi	46.35
Cupressus_virus_1	Sciadopitys_virus_1_Can	46.30
Cupressus_virus_1	Taxus_virus_1	45.78
Cupressus_virus_1	Amentotaxus_virus_1	44.92
Sciadopitys_virus_1_Chi	Sciadopitys_virus_1_Can	94.59
Sciadopitys_virus_1_Chi	Taxus_virus_1	44.66
Sciadopitys_virus_1_Chi	Amentotaxus_virus_1	44.54
Sciadopitys_virus_1_Can	Taxus_virus_1	44.41
Sciadopitys_virus_1_Can	Amentotaxus_virus_1	44.56
Taxus_virus_1	Amentotaxus_virus_1	51.73
